## Multi-population genomic prediction

# 1 **Genomic prediction using individual-level data and summary statistics from multiple** 2 **populations**

3 Jeremie Vandenplas\*, Mario P.L. Calus\*, Gregor Gorjanc†

4

5 \* Wageningen University & Research, Animal Breeding and Genomics, 6700 AH

6 Wageningen, The Netherlands

7 † The Roslin Institute and Royal (Dick) School of Veterinary Studies, University of

8 Edinburgh, Easter Bush Research Centre, Midlothian EH25 9RG, UK

9

## Multi-population genomic prediction

10 Running title: Multi-population genomic prediction

11

12 Key words: meta-analysis, quantitative trait, statistical method

13

14 Author information:

15 Jeremie Vandenplas

16 Wageningen University & Research

17 Animal Breeding and Genomics

18 P.O. box 338, 6700 AH Wageningen, the Netherlands

19 E-mail: [jeremie.vandenplas @wur.nl](mailto:jeremie.vandenplas@wur.nl)

20 Phone: +31 06 83642304

21

## Multi-population genomic prediction

22

### ABSTRACT

23           This study presents a method for genomic prediction that uses individual-level data and  
24 summary statistics from multiple populations. Genome-wide markers are nowadays widely  
25 used to predict complex traits, and genomic prediction using multi-population data is an  
26 appealing approach to achieve higher prediction accuracies. However, sharing of individual-  
27 level data across populations is not always possible. We present a method that enables  
28 integration of summary statistics from separate analyses with the available individual-level  
29 data. The data can either consist of individuals with single or multiple (weighted) phenotype  
30 records per individual. We developed a method based on a hypothetical joint analysis model  
31 and absorption of population specific information. We show that population specific  
32 information is fully captured by estimated allele substitution effects and the accuracy of those  
33 estimates, i.e. the summary statistics. The method gives identical result as the joint analysis of  
34 all individual-level data when complete summary statistics are available. We provide a series  
35 of easy-to-use approximations that can be used when complete summary statistics are not  
36 available or impractical to share. Simulations show that approximations enables integration of  
37 different sources of information across a wide range of settings yielding accurate predictions.  
38 The method can be readily extended to multiple-traits. In summary, the developed method  
39 enables integration of genome-wide data in the individual-level or summary statistics form from  
40 multiple populations to obtain more accurate estimates of allele substitution effects and  
41 genomic predictions.

42

## Multi-population genomic prediction

43

### INTRODUCTION

44           Genome-wide markers are nowadays widely used to predict complex traits. This  
45 prediction is based on a linear model that partitions for each individual the observed complex  
46 phenotype value into systematic effects, comprising at least a population mean, an individual  
47 genetic value and an environmental deviation (Fisher, 1918). With genome-wide markers,  
48 individual genetic values can be computed from allele substitution effects estimated from  
49 individual-level phenotype and genotype data (Meuwissen et al., 2001). Subsequently, genetic  
50 values can be also computed for individuals of interest that are genotyped, but not phenotyped.  
51 This process is commonly called genomic prediction. In animal and plant breeding, genetic  
52 values are used to identify genetically superior individuals and use them as parents of the next  
53 generation to improve complex traits like milk yield (Meuwissen et al., 2001; VanRaden, 2008)  
54 or grain yield (Schulthess et al., 2016) In human genetics, genetic values can be used to predict  
55 individual genetic risk for complex diseases to inform preventive and personalized medicine  
56 (Campos et al., 2010; Wray et al., 2013; Pasaniuc and Price, 2017).

57           Accuracy of estimated allele substitution effects and of resulting genetic values for  
58 complex traits are foremost a function of the amount of available data (Daetwyler et al., 2008).  
59 To maximize the prediction accuracy, use of all available data is recommended (Henderson,  
60 1984; Wray et al., 2013; Vilhjálmsson et al., 2015). In some small populations, collecting large  
61 amounts of data is not possible, and a joint analysis across multiple populations is needed to  
62 achieve high accuracy (Hozé et al., 2014; Wientjes et al., 2016). However, such joint analysis  
63 is often impossible, because of logistic or privacy considerations (Powell and Norman, 1998;  
64 Maier et al., 2018). Therefore, several methods were proposed to enable analysis of data from  
65 multiple populations when individual-level data is not available (Pasaniuc and Price, 2017; Liu  
66 and Goddard, 2018; Maier et al., 2018). These methods approximate a joint analysis by first  
67 obtaining summary statistics from separate analyses of individual-level data for each population

## Multi-population genomic prediction

68 and then combine these summary statistics to estimate genetic values. In human genetics,  
69 summary statistics usually consist of publically available allele substitution effects, i.e.,  
70 genome-wide associations, together with their standard errors, estimated independently for each  
71 marker (Yang et al., 2012; Vilhjálmsson et al., 2015; Maier et al., 2018). In livestock, summary  
72 statistics more likely consist of allele substitution effects estimated jointly for all markers,  
73 together with prediction error (co)variances (Liu and Goddard, 2018). While these methods  
74 may increase prediction accuracy in comparison to separate analyses, a loss in prediction  
75 accuracy is expected relative to an analysis using all individual-level data due to approximations  
76 (Maier et al., 2018). Further, these methods are based on some assumptions that make them  
77 difficult to apply outside their context of development. For example, Maier et al. (2018)  
78 implicitly assumed that only a single phenotype record per trait was associated with an  
79 individual. While this is usually the case in human genetics, it is not in breeding populations  
80 where individuals may have repeated phenotype records for the same trait, e.g., repeated  
81 longitudinal production or reproduction records in livestock or replicated field trials in crops,  
82 or when phenotype records are measured on a group of individuals and linked to a genotyped  
83 relative, e.g., progeny tested bulls for dairy production.

84 The objective of this study was to develop a method that jointly analyses individual-  
85 level data and summary statistics from multiple populations with no or limited amount of  
86 approximation. The method assumes that individual-level data is composed of marker  
87 genotypes and phenotype records that potentially have a variable number of replicates per  
88 individual. Further, summary statistics are assumed to be composed of estimated allele  
89 substitution effects with an associated measure of accuracy. Different measures of accuracy can  
90 be used, which controls the amount of approximation. The developed method is validated with  
91 simulated data. The results show that the method enables accurate integration of different  
92 sources of information across a wide range of settings.

## Multi-population genomic prediction

### 94 MATERIAL AND METHODS

95 The first part of this section describes the theory of (1) separate and joint analyses of  
96 two individual-level datasets, (2) an exact integration of estimated allele substitution effects  
97 from one population into the analysis of another, (3) approximate integrations, and (4)  
98 generalization for multiple populations. The second part describes simulations used for  
99 validation of the developed method.

### 100 Theory

101 Assume we have two populations with individual-level datasets of phenotyped and  
102 genotyped individuals. The two populations and their corresponding datasets are hereafter  
103 referred to as 1 and 2. Further assume that both datasets contain the same markers. From this  
104 data we want to obtain accurate estimates of allele substitution effects and genetic values for  
105 complex traits. We can achieve this by a joint analysis of the two datasets. When one of the  
106 datasets is not available, we can achieve this by integrating the results of a separate analysis of  
107 the unavailable data into the separate analysis of the available dataset. We show how to perform  
108 this integration exactly or approximately.

### 109 *Separate and joint analyses*

110 A standard marker model, using random regression on marker genotypes, for the  
111 separate analysis of dataset  $i$  ( $i = 1, 2$ ) is:

$$112 \quad \mathbf{y}_i = \mathbf{X}_i \boldsymbol{\beta}_i^* + \mathbf{Z}_i \mathbf{W}_i \boldsymbol{\alpha}_i^* + \mathbf{e}_i^*, \quad (1)$$

113 where  $\mathbf{y}_i$  is a  $n_{obs,i} \times 1$  vector of phenotypes,  $\boldsymbol{\beta}_i^*$  is a  $n_{f,i} \times 1$  vector of fixed effects that are  
114 linked to  $\mathbf{y}_i$  by a  $n_{obs,i} \times n_{f,i}$  incidence matrix  $\mathbf{X}_i$ ,  $\boldsymbol{\alpha}_i^*$  is a  $n_{mar} \times 1$  vector of allele  
115 substitution effects that are linked to  $\mathbf{y}_i$  by a  $n_{obs,i} \times n_{ind,i}$  incidence matrix  $\mathbf{Z}_i$  and a  $n_{ind,i} \times$   
116  $n_{mar}$  matrix of genotypes  $\mathbf{W}_i$ , and  $\mathbf{e}_i^*$  is the vector  $n_{obs,i} \times 1$  of residuals. In this work we

## Multi-population genomic prediction

117 consider single-nucleotide polymorphism markers, which we code in  $\mathbf{W}_i$  as 0 for homozygous  
 118 aa, 1 for heterozygous aA or Aa, and 2 for homozygous AA. Other genotype coding and  
 119 centering, that is of the form  $(\mathbf{W}_i - \mathbf{1}\mathbf{v}_i')$  with  $\mathbf{1}$  being a  $n_{ind,i} \times 1$  vector of ones and  $\mathbf{v}_i$  being a  
 120  $n_{mar} \times 1$  vector, can be used with no difference in obtained estimates of allele substitution  
 121 effects (Strandén and Christensen, 2011). We assume a prior multivariate normal (MVN)  
 122 distribution for allele substitution effects for the separate analysis of the dataset  $i$ ,  $\boldsymbol{\alpha}_i^*$ , with mean  
 123 zero and covariance  $\mathbf{B}_i \sigma_{\alpha_i}^2$ ,  $\boldsymbol{\alpha}_i^* \sim MVN(\mathbf{0}, \mathbf{B}_i \sigma_{\alpha_i}^2)$ , where  $\mathbf{B}_i$  is a  $n_{mar} \times n_{mar}$  diagonal matrix  
 124 (e.g., an identity matrix  $\mathbf{I}$ ), and  $\sigma_{\alpha_i}^2$  is the variance of allele substitution effects. We also assume  
 125 that residuals are multivariate normally distributed with mean zero and covariance  $\mathbf{R}_i \sigma_e^2$ ,  
 126  $\mathbf{e}_i^* \sim MVN(\mathbf{0}, \mathbf{R}_i \sigma_e^2)$ , where  $\mathbf{R}_i$  is a  $n_{obs,i} \times n_{obs,i}$  diagonal matrix (e.g., an identity matrix  $\mathbf{I}$ ),  
 127 and  $\sigma_e^2$  is the residual variance. For simplicity and without loss of generality, it is assumed in  
 128 the following that residual variances are the same for all separate and joint analyses. Variance  
 129 components  $\sigma_{\alpha_i}^2$  and  $\sigma_e^2$  are assumed known, as they will have been estimated from the data  
 130 previously. This marker model is the ridge regression model (Hoerl and Kennard, 1976;  
 131 Whittaker et al., 2000; Meuwissen et al., 2001; de los Campos et al., 2012) with optional  
 132 different weights in  $\mathbf{B}_i$  (to differentially shrink different loci) and  $\mathbf{R}_i$  (to account for  
 133 heterogeneous residual variance due to variable number of repeated phenotype records per  
 134 individual).

135 Separate estimates of allele substitution effects  $\widehat{\boldsymbol{\alpha}}_i^*$  are obtained by solving the following  
 136 system of equations:

$$137 \begin{bmatrix} \mathbf{X}_i' \mathbf{R}_i^{-1} \sigma_e^{-2} \mathbf{X}_i & \mathbf{X}_i' \mathbf{R}_i^{-1} \sigma_e^{-2} \mathbf{Z}_i \mathbf{W}_i \\ \mathbf{W}_i' \mathbf{Z}_i' \mathbf{R}_i^{-1} \sigma_e^{-2} \mathbf{X}_i & \mathbf{W}_i' \mathbf{Z}_i' \mathbf{R}_i^{-1} \sigma_e^{-2} \mathbf{Z}_i \mathbf{W}_i + \mathbf{B}_i^{-1} \sigma_{\alpha_i}^{-2} \end{bmatrix} \begin{bmatrix} \widehat{\boldsymbol{\beta}}_i^* \\ \widehat{\boldsymbol{\alpha}}_i^* \end{bmatrix} = \begin{bmatrix} \mathbf{X}_i' \mathbf{R}_i^{-1} \sigma_e^{-2} \mathbf{y}_i \\ \mathbf{W}_i' \mathbf{Z}_i' \mathbf{R}_i^{-1} \sigma_e^{-2} \mathbf{y}_i \end{bmatrix}. \quad (2)$$

138 Separate estimates of genetic values for individuals in a dataset  $i$  ( $i = 1, 2$ ) are  
 139 obtained by  $\widehat{\mathbf{g}}_i^* = \mathbf{W}_i \widehat{\boldsymbol{\alpha}}_i^*$ .

## Multi-population genomic prediction

140 A marker model for the joint analysis of two datasets 1 and 2 is:

$$141 \begin{bmatrix} \mathbf{y}_1 \\ \mathbf{y}_2 \end{bmatrix} = \begin{bmatrix} \mathbf{X}_1 & \mathbf{0} \\ \mathbf{0} & \mathbf{X}_2 \end{bmatrix} \begin{bmatrix} \boldsymbol{\beta}_1 \\ \boldsymbol{\beta}_2 \end{bmatrix} + \begin{bmatrix} \mathbf{Z}_1 & \mathbf{W}_1 \\ \mathbf{Z}_2 & \mathbf{W}_2 \end{bmatrix} \boldsymbol{\alpha} + \begin{bmatrix} \mathbf{e}_1 \\ \mathbf{e}_2 \end{bmatrix}, \quad (3)$$

142 where phenotypes from the two populations are modelled with populations specific fixed effects

143  $(\boldsymbol{\beta}_1, \boldsymbol{\beta}_2)$ , but a joint set of allele substitution effects  $(\boldsymbol{\alpha})$ . We assume a multivariate normal

144 prior distribution for allele substitution effects with mean zero and covariance  $\mathbf{B}_J \sigma_{\alpha_j}^2$ ,

145  $\boldsymbol{\alpha} \sim MVN(\mathbf{0}, \mathbf{B}_J \sigma_{\alpha_j}^2)$ , where  $\mathbf{B}_J$  is a  $n_{mar} \times n_{mar}$  diagonal matrix, and  $\sigma_{\alpha_j}^2$  is the variance of

146 allele substitution effects in the joint analysis. We also assume that residuals are multivariate

147 normally distributed, specifically  $\begin{bmatrix} \mathbf{e}_1 \\ \mathbf{e}_2 \end{bmatrix} \sim MVN\left(\begin{bmatrix} \mathbf{0} \\ \mathbf{0} \end{bmatrix}, \begin{bmatrix} \mathbf{R}_1 & \mathbf{0} \\ \mathbf{0} & \mathbf{R}_2 \end{bmatrix} \sigma_e^2\right)$  where  $\mathbf{R}_i$  is a  $n_{obs,i} \times$

148  $n_{obs,i}$  diagonal matrix.

149 Joint estimates of allele substitution effects  $\hat{\boldsymbol{\alpha}}$  are obtained by solving the following

150 system of equations:

$$151 \begin{bmatrix} \mathbf{X}'_1 \mathbf{R}_1^{-1} \sigma_e^{-2} \mathbf{X}_1 & \mathbf{0} & \mathbf{X}'_1 \mathbf{R}_1^{-1} \sigma_e^{-2} \mathbf{Z}_1 \mathbf{W}_1 \\ \mathbf{0} & \mathbf{X}'_2 \mathbf{R}_2^{-1} \sigma_e^{-2} \mathbf{X}_2 & \mathbf{X}'_2 \mathbf{R}_2^{-1} \sigma_e^{-2} \mathbf{Z}_2 \mathbf{W}_2 \\ \mathbf{W}'_1 \mathbf{Z}'_1 \mathbf{R}_1^{-1} \sigma_e^{-2} \mathbf{X}_1 & \mathbf{W}'_2 \mathbf{Z}'_2 \mathbf{R}_2^{-1} \sigma_e^{-2} \mathbf{X}_2 & \mathbf{W}'_1 \mathbf{Z}'_1 \mathbf{R}_1^{-1} \sigma_e^{-2} \mathbf{Z}_1 \mathbf{W}_1 + \mathbf{W}'_2 \mathbf{Z}'_2 \mathbf{R}_2^{-1} \sigma_e^{-2} \mathbf{Z}_2 \mathbf{W}_2 + \mathbf{B}_J^{-1} \sigma_{\alpha_j}^{-2} \end{bmatrix} \begin{bmatrix} \hat{\boldsymbol{\beta}}_1 \\ \hat{\boldsymbol{\beta}}_2 \\ \hat{\boldsymbol{\alpha}} \end{bmatrix} =$$

$$152 \begin{bmatrix} \mathbf{X}'_1 \mathbf{R}_1^{-1} \sigma_e^{-2} \mathbf{y}_1 \\ \mathbf{X}'_2 \mathbf{R}_2^{-1} \sigma_e^{-2} \mathbf{y}_2 \\ \mathbf{W}'_1 \mathbf{Z}'_1 \mathbf{R}_1^{-1} \sigma_e^{-2} \mathbf{y}_1 + \mathbf{W}'_2 \mathbf{Z}'_2 \mathbf{R}_2^{-1} \sigma_e^{-2} \mathbf{y}_2 \end{bmatrix} \quad (4).$$

153 Joint estimates of genetic values for individuals in a dataset  $i$  ( $i = 1, 2$ ) are obtained by

$$154 \hat{\mathbf{g}}_i = \mathbf{W}_i \hat{\boldsymbol{\alpha}}.$$

### 155 *Exact integration*

156 The integration of estimates of allele substitution effects from one dataset into the

157 analysis of another can be performed by means of absorbing corresponding equations in the



## Multi-population genomic prediction

158 joint system of equations. We choose to integrate estimates from the dataset 1 into the analysis  
 159 of dataset 2. Derivations in Appendix A1 lead to the following system of equations that  
 160 performs such integration and gives equivalent estimates of allele substitution effects to the  
 161 joint analysis (4):

$$\begin{aligned}
 & \left[ \begin{array}{c} \mathbf{X}'_2 \mathbf{R}_2^{-1} \sigma_e^{-2} \mathbf{X}_2 & \mathbf{X}'_2 \mathbf{R}_2^{-1} \sigma_e^{-2} \mathbf{Z}_2 \mathbf{W}_2 \\ \mathbf{W}'_2 \mathbf{Z}'_2 \mathbf{R}_2^{-1} \sigma_e^{-2} \mathbf{X}_2 & \left(PEC(\widehat{\boldsymbol{\alpha}}_1^*)\right)^{-1} + \mathbf{W}'_2 \mathbf{Z}'_2 \mathbf{R}_2^{-1} \sigma_e^{-2} \mathbf{Z}_2 \mathbf{W}_2 - \mathbf{B}_1^{-1} \sigma_{\alpha_1}^{-2} + \mathbf{B}_J^{-1} \sigma_{\alpha_J}^{-2} \end{array} \right] \begin{bmatrix} \widehat{\boldsymbol{\beta}}_2 \\ \widehat{\boldsymbol{\alpha}} \end{bmatrix} = \\
 & \left[ \begin{array}{c} \mathbf{X}'_2 \mathbf{R}_2^{-1} \sigma_e^{-2} \mathbf{y}_2 \\ \left(PEC(\widehat{\boldsymbol{\alpha}}_1^*)\right)^{-1} \widehat{\boldsymbol{\alpha}}_1^* + \mathbf{W}'_2 \mathbf{Z}'_2 \mathbf{R}_2^{-1} \sigma_e^{-2} \mathbf{y}_2 \end{array} \right], \quad (5)
 \end{aligned}$$

164 where  $\widehat{\boldsymbol{\alpha}}_1^*$  are estimates of allele substitution effects from the separate analysis of dataset 1 using  
 165 (2), and  $\left(PEC(\widehat{\boldsymbol{\alpha}}_1^*)\right)^{-1}$  is the inverse of the corresponding prediction error covariance (PEC)  
 166 matrix. The latter can be obtained as  $\left(PEC(\widehat{\boldsymbol{\alpha}}_1^*)\right)^{-1} = \mathbf{W}'_1 \mathbf{Z}'_1 \mathbf{M}_1 \sigma_e^{-2} \mathbf{Z}_1 \mathbf{W}_1 + \mathbf{B}_1^{-1} \sigma_{\alpha_1}^{-2}$  with  
 167  $\mathbf{M}_1 = \left(\mathbf{R}_1^{-1} - \mathbf{R}_1^{-1} \mathbf{X}_1 \left(\mathbf{X}'_1 \mathbf{R}_1^{-1} \mathbf{X}_1\right)^{-1} \mathbf{X}'_1 \mathbf{R}_1^{-1}\right)$ . Note that only the individual-level dataset 2 and  
 168 summary statistics from the dataset 1 (i.e., the estimated allele substitution effects and their  
 169 PEC) are required. Individual-level dataset 1 is therefore not required.

170 It is worth noting that the integration of estimates of allele substitution effects from the  
 171 dataset 1 into the analysis of dataset 2 can also be obtained from a Bayesian context. Bayes  
 172 estimators for linear mixed models were discussed by several authors (Lindley and Smith,  
 173 1972; Dempfle, 1977; Gianola and Fernando, 1986). In a Bayesian context, we can assume  
 174 the following prior multivariate normal distributions for the marker model (1) applied to  
 175 dataset 2:

176  $[\boldsymbol{\beta}_2^* | \mathbf{U}_2] \sim MVN(\mathbf{b}_2, \mathbf{U}_2)$ , where  $\mathbf{b}_2$  is a mean vector and  $\mathbf{U}_2$  is a (co)variance matrix,

177  $[\boldsymbol{\alpha}_2^* | \mathbf{B}_2 \sigma_{\alpha_2}^2] \sim MVN(\mathbf{0}, \mathbf{B}_2 \sigma_{\alpha_2}^2)$ , and

## Multi-population genomic prediction

178  $[\mathbf{e}_2^* | \mathbf{R}_2 \sigma_e^2] \sim MVN(\mathbf{0}, \mathbf{R}_2 \sigma_e^2).$

179 Assuming a noninformative prior for  $\boldsymbol{\beta}_2^*$ , the system of equations (2) for dataset 2 can be  
 180 obtained by differentiating the joint posterior distribution of  $\boldsymbol{\beta}_2^*$  and  $\boldsymbol{\alpha}_2^*$  with respect to  $\boldsymbol{\beta}_2^*$  and  
 181  $\boldsymbol{\alpha}_2^*$ , and setting the derivatives equal to 0 (Gianola and Fernando, 1986). Integration of  
 182 estimates of allele substitution effects from dataset 1 into the analysis of dataset 2 can be  
 183 therefore obtained by defining a multivariate normal prior distribution for allele substitution  
 184 effects in the analysis of dataset 2 using the posterior distribution for allele substitution effects  
 185 from a separate analysis of dataset 1:

186  $[\boldsymbol{\alpha} | \widehat{\boldsymbol{\alpha}}_1^*, PEC(\widehat{\boldsymbol{\alpha}}_1^*), \mathbf{B}_1 \sigma_{\alpha_1}^2, \mathbf{B}_j \sigma_{\alpha_j}^2] \sim MVN\left(\mathbf{Q} \left(PEC(\widehat{\boldsymbol{\alpha}}_1^*)\right)^{-1} \widehat{\boldsymbol{\alpha}}_1^*, \mathbf{Q}\right),$  (6)

187  $\mathbf{Q} = \left( \left(PEC(\widehat{\boldsymbol{\alpha}}_1^*)\right)^{-1} - \mathbf{B}_1^{-1} \sigma_{\alpha_1}^{-2} + \mathbf{B}_j^{-1} \sigma_{\alpha_j}^{-2} \right)^{-1}.$

188 The matrix  $\mathbf{Q}$  can be considered as the PEC matrix of a hypothetical separate analysis of  
 189 dataset 1 using the multivariate normal prior distribution for allele substitution effects of the  
 190 joint analysis, that is  $\boldsymbol{\alpha}_1^* \sim MVN(\mathbf{0}, \mathbf{B}_j \sigma_{\alpha_j}^2)$  and  $\mathbf{Q} = \left( \mathbf{W}_1' \mathbf{Z}_1' \mathbf{M}_1 \sigma_e^{-2} \mathbf{Z}_1 \mathbf{W}_1 + \mathbf{B}_j^{-1} \sigma_{\alpha_j}^{-2} \right)^{-1}$ , and  
 191 the vector  $\mathbf{Q} \left(PEC(\widehat{\boldsymbol{\alpha}}_1^*)\right)^{-1} \widehat{\boldsymbol{\alpha}}_1^*$  can be considered as the estimated allele substitution effects of  
 192 this hypothetical separate analysis. In animal breeding, a similar approach was used to  
 193 integrate estimated genetic values and associated accuracies from one genetic evaluation into  
 194 another genetic evaluation (Quaas and Zhang, 2006; Legarra et al., 2007; Vandenplas and  
 195 Gengler, 2012).

196 Finally, it is worth noting that the term  $\left(PEC(\widehat{\boldsymbol{\alpha}}_1^*)\right)^{-1} \widehat{\boldsymbol{\alpha}}_1^*$  can be interpreted as pseudo-  
 197 phenotypes associated with allele substitution effects of dataset 2, derived from information in  
 198 dataset 1. In this sense, the system (5) is similar to approaches that compute pseudo-

## Multi-population genomic prediction

199 phenotypes from available estimated genetic values where individual-level phenotypic  
200 information is not readily available, or is not measured on the individuals themselves but on  
201 close relatives. In animal breeding, these approaches are commonly known as deregression of  
202 estimated genetic values (Jairath et al., 1998).

### 203 *Approximate integration*

204 Exact integration requires the inverse of prediction error covariance matrix from the  
205 separate analysis, which could be approximated when unavailable. Genomic analyses of  
206 complex traits that combine different datasets commonly have access to estimated allele  
207 substitution effects and associated prediction error variances (in different forms), but not the  
208 whole prediction error covariance matrix  $PEC(\widehat{\alpha}_1^*)$  required in (5). We propose several ways  
209 to accommodate this situation. We assume that we know, at least, the prediction error variances  
210 (PEV) of estimated allele substitution effects ( $PEV(\widehat{\alpha}_1^*)$ ), the number of individuals ( $n_{ind,1}$ )  
211 and variance components used in the separate analysis of dataset 1 ( $\sigma_{\alpha_1}^2$  and  $\sigma_e^2$ ).

212 When only the prediction error variances of the estimated allele substitution effects  
213 ( $PEV(\widehat{\alpha}_1^*)$ ) are known, while PEC are not, then we can approximate  $(PEC(\widehat{\alpha}_1^*))^{-1}$  with  
214  $(PEV(\widehat{\alpha}_1^*))^{-1}$ . This approximation would be accurate if the matrix product  $\mathbf{W}'_1\mathbf{W}_1$  has (close  
215 to) zero off-diagonal elements, which is dependent on the characteristics of genotypes in dataset  
216 1 (e.g., allele frequencies, linkage disequilibrium (LD), and population/family structure). If this  
217 is not the case, the approximation will bias the analysis by ignoring off-diagonal elements.

218 When allele frequencies and LD correlations in dataset 1 are known, we can obtain a  
219 good approximation of  $PEC(\widehat{\alpha}_1^*)$  under some conditions (one phenotype record per individual,  
220 homogenous residual variance, overall mean is the only fixed effect, and Hardy-Weinberg  
221 equilibrium). Derivations in Appendix A2 show that under these conditions we can approximate

## Multi-population genomic prediction

222  $PEC(\widehat{\alpha}_1^*)$  with  $(\mathbf{W}'_1\mathbf{W}_1\sigma_e^{-2} + \mathbf{B}_1^{-1}\sigma_{\alpha_1}^{-2})^{-1}$  with the unknown matrix  $\mathbf{W}'_1\mathbf{W}_1$  approximated  
 223 from commonly available population parameters (i.e., allele frequencies and LD correlation) as  
 224  $4n_{ind,1}\mathbf{p}\mathbf{p}' + \mathbf{V}^{\frac{1}{2}}\mathbf{C}\mathbf{V}^{\frac{1}{2}}$ , where  $\mathbf{p}$  is a  $n_{mar} \times 1$  vector of allele frequencies,  $\mathbf{V}$  is a  $n_{mar} \times n_{mar}$   
 225 diagonal matrix of expected genotype sum of squares with the  $i$ -th diagonal element equal to  
 226  $n_{ind,1}2p_{i,1}(1 - p_{i,1})$ , and  $\mathbf{C}$  is a  $n_{mar} \times n_{mar}$  matrix of pairwise genotype correlations between  
 227 markers. In practice, the matrix  $\mathbf{C}$  for dataset 1 could be unknown, but we can approximate it  
 228 by using a reference panel that includes, for example, available genotypes of non-phenotyped  
 229 individuals originating from this population (Yang et al., 2012; Vilhjálmsson et al., 2015; Maier  
 230 et al., 2018).

231 Finally, we relax the assumption of having a single phenotype record per individual in  
 232 the preceding approximations. This is relevant when individuals have repeated phenotype  
 233 records, e.g., repeated longitudinal production or reproduction records in livestock or replicated  
 234 field trials in crops. A related issue is the violation of assumption of homogenous residual  
 235 variance when phenotype records are first pre-processed and then used in genomic analyses,  
 236 e.g., deregressed progeny proofs in livestock (e.g., Garrick et al., 2009) or adjusted field trial  
 237 means in crops (e.g., Schulz-Streeck et al., 2013; Oakey et al., 2016; Damesa et al., 2017). For  
 238 these situations, we show in Appendix A3 that we can approximate  $PEC(\widehat{\alpha}_1^*)$  with

239  $(\mathbf{\Lambda}_1(4\mathbf{p}\mathbf{p}' + \mathbf{\Psi}^{\frac{1}{2}}\mathbf{C}\mathbf{\Psi}^{\frac{1}{2}})\mathbf{\Lambda}_1\sigma_e^{-2} + \mathbf{B}_1^{-1}\sigma_{\alpha_1}^{-2})^{-1}$  where  $\mathbf{\Psi}$  is a  $n_{mar} \times n_{mar}$  diagonal matrix with  
 240 the  $j$ -th diagonal element equal to  $2p_{j,1}(1 - p_{j,1})$ , and  $\mathbf{\Lambda}_1$  is a  $n_{mar} \times n_{mar}$  diagonal matrix  
 241 with the  $j$ -th diagonal element representing the square root of effective number of records for  
 242 the  $j$ -th marker. The matrix  $\mathbf{\Lambda}_1$  can be obtained by solving the nonlinear system of equations

$$243 \text{diag}\left(\left(\mathbf{\Lambda}_1(4\mathbf{p}\mathbf{p}' + \mathbf{\Psi}^{\frac{1}{2}}\mathbf{C}\mathbf{\Psi}^{\frac{1}{2}})\mathbf{\Lambda}_1\sigma_e^{-2} + \mathbf{B}_1^{-1}\sigma_{\alpha_1}^{-2}\right)^{-1}\right) = PEV(\widehat{\alpha}_1^*)$$

## Multi-population genomic prediction

244 through a fixed-point iteration algorithm (Burden and Faires, 2010) detailed in Appendix A3.  
245 It is worth noting that the proposed algorithm requires the inversion of a  $n_{mar} \times n_{mar}$  dense  
246 matrix at each iteration. This computational cost can be reduced by performing the algorithm  
247 for each chromosome separately.

### 248 *Integration with multiple populations*

249 When more than two populations or datasets are available the developed methods can  
250 be easily extended. With  $n$  datasets, the prior distribution for allele substitution effects in the  
251 separate analysis of the  $n$ -th dataset is defined using the posterior distributions for allele  
252 substitution effects from the separate analyses of  $n - 1$  datasets:

$$253 \quad [\alpha | \widehat{\alpha}_1^*, \widehat{\alpha}_2^*, \dots, \widehat{\alpha}_{n-1}^*] \sim MVN \left( \mathbf{Q} \sum_{i=1}^{n-1} \left( (PEC(\widehat{\alpha}_i^*))^{-1} \widehat{\alpha}_i^* \right), \mathbf{Q} \right),$$

$$254 \quad \mathbf{Q} = \left( \mathbf{B}_J^{-1} \sigma_{\alpha_j}^{-2} + \sum_{i=1}^{n-1} \left( (PEC(\widehat{\alpha}_i^*))^{-1} - \mathbf{B}_i^{-1} \sigma_{\alpha_i}^{-2} \right) \right)^{-1}.$$

### 255 **Simulations**

256 We tested developed methods with simulated data that either had low or high genetic  
257 diversity. The data was simulated in 5 replicates with the AlphaSim program, which uses the  
258 coalescent method for simulation of base population chromosomes and the gene drop method  
259 for simulation of chromosome inheritance within a pedigree (Hickey and Gorjanc, 2012; Faux  
260 et al., 2016).

261 A diploid genome was simulated with 30 chromosomes, each  $10^8$  base pairs long.  
262 Coalescent mutation and recombination rate per base pair were set to  $10^{-8}$ , while effective  
263 population size was modelled over time to mimic population history of a livestock population  
264 in line with the values reported by MacLeod et al. (2013). Specifically, for the low diversity  
265 scenario effective population size of the base population was set to 100 and increased to 120,

## Multi-population genomic prediction

266 250, 350, 1,000, 1,500, 2,000, 2,500, 3,500, 7,000, 10,000, 17,000, and 62,000 at respectively  
267 6, 12, 18, 24, 154, 454, 654, 1,754, 2,354, 3,354, 33,154, and 933,154 generations ago. For the  
268 high diversity scenario, effective population size of the base population was set to 10,000 and  
269 increased above this value in the same way as in the low diversity scenario; to 17,000 and  
270 62,000 at 33,154, and 933,154 generations ago. For each chromosome 10,000 whole  
271 chromosome haplotypes were sampled, which on average hosted about 700,000 markers (21  
272 million per genome) for the low diversity scenario and 1,400,000 markers (42 million per  
273 genome) for the high diversity scenario. Out of these loci 100 per chromosome (3,000 per  
274 genome) were sampled as causal loci affecting a complex trait. The allele substitution effect of  
275 causal loci was sampled from a normal distribution with mean zero and variance  $1/3,000$ . The  
276 effects were used to simulate a complex trait with additive genetic architecture. In addition,  
277 2,000 loci per chromosome (60,000 per genome) were selected as markers with the restriction  
278 of having minor allele frequency above 0.05.

279 From the base population, founder genomes for four populations (A, B, C, and D) were  
280 obtained by random sampling of chromosomes with recombination. The populations were  
281 ancestrally related through the common base population, but otherwise maintained  
282 independently, i.e., there was no migration between the four populations. Each population was  
283 initiated with 10,000 founders (half males and half females) and maintained for 7 generations  
284 with constant size. In the low diversity scenario, with the effective population size of 100, 25  
285 males and 5,000 females were selected as parents of each generation, while in the high diversity  
286 scenario, with the effective population size of 10,000, all 5,000 males and 5,000 females were  
287 used. The 25 males were selected on true genetic value, assuming accurate progeny test was  
288 available.

289 For every individual in the population we simulated two types of phenotypes. First, an  
290 own single phenotype was simulated as the sum of the true genetic value and a residual sampled

## Multi-population genomic prediction

291 from a normal distribution with mean zero and residual variance scaled relative to the variance  
292 of true genetic value in the base population such that heritability was 0.3. These simulated single  
293 phenotype records mimic records measured on the individual. Second, a weighted phenotype  
294 was simulated as the sum of the true genetic value and the mean of  $n_{weight}$  residuals. Each  
295 residual was sampled from a normal distribution with mean zero and residual variance scaled  
296 relative to the variance of true genetic value in the base population such that heritability was  
297 0.3. The weight  $n_{weight}$  was equal to  $n_{weight} = 1 + val$  where the real value  $val$  was sampled  
298 from a geometric distribution with a probability of 0.15. The average  $n_{weight}$  was 6.6. These  
299 weighted phenotypes mimic either repeated records of an individual or records on multiple  
300 progeny of an individual. To satisfy the assumption of identical residual variance across all  
301 analyses, phenotype records were divided by the residual standard deviation specific for each  
302 population, such that  $\sigma_e^2 = 1$ . For every individual in each population we stored the true genetic  
303 value, own single and weighted phenotype records, associated weight, and 60,000 marker  
304 genotypes.

### 305 **Analysis**

306 The data was analysed in several ways to evaluate the developed methods. In each case  
307 the aim was to obtain accurate genetic values utilizing all the available information.  
308 Specifically, we integrated results from separate analysis of populations B, C, and D, into the  
309 analysis of population A. We assumed throughout that variance components were known and  
310 equal to the rescaled variances. We analysed three scenarios in total. The first and second  
311 scenario used population specific training data of randomly sampled 30,000 individuals with  
312 single phenotype record from generations 1 to 6 under low and high diversity settings. The third  
313 scenario used population specific training data of randomly sampled 10,000 individuals with  
314 weighted phenotype record from generations 1 to 6 under low diversity setting. In all scenarios

## Multi-population genomic prediction

315 all of the 10,000 individuals from generation 7 of each population were considered as validation  
316 individuals. The following analyses were performed:

- 317 1) A joint analysis of four populations. This was the reference that the other analyses  
318 were compared against;
- 319 2) A separate analysis for each of the four populations;
- 320 3) An exact integration of separate analyses of populations B, C, and D, into the  
321 analysis of population A;
- 322 4) The same as 3), but approximating the PEC matrix with a partial PEC matrix for  
323 each chromosome, i.e., PEC between markers on different chromosomes were set  
324 to zero;
- 325 5) The same as 3), but approximating the PEC matrix with a diagonal PEV matrix, i.e.,  
326 PEC between all markers were set to zero;
- 327 6) The same as 3), but approximating the PEC matrix with PEV, allele frequencies,  
328 and LD correlations between markers obtained from the training sets. For the  
329 scenario with weighted phenotype records, the algorithm for estimating the effective  
330 number of records per marker was performed for each marker separately and for  
331 each chromosome separately.
- 332 7) The same as 6), but with LD correlations between markers computed from  
333 validation individuals instead of the training data.

334 For each analysis we calculated genomic prediction accuracy as the Pearson correlation  
335 between the true and estimated genetic value in validation individuals. Further, we evaluated  
336 the different integrations by comparing estimated genetic values of validation individuals  
337 against the estimated genetic values obtained from the joint analysis, which was considered as  
338 the reference because it used information from all populations. If integration was fully accurate,  
339 there should be no difference between the joint analysis and the analysis with integration. We



## Multi-population genomic prediction

340 assessed this by (a) accuracy of integration as a Pearson correlation between estimated genetic  
341 values from the joint analysis and the analysis with integration (desired value equals 1), (b)  
342 calibration of integration as a regression of estimated genetic values from the joint analysis on  
343 estimated genetic values from analysis with integration (desired value equals 1), and (c)  
344 magnitude of error in integration as a mean square error (MSE) between estimated genetic  
345 values from the joint analysis and from the analysis with integration (desired value equals 0).

### 346 **Data availability**

347 Supplemental figures are available in File S1. A description of the simulated genotype  
348 and phenotype datasets for each scenario is provided in File S2. Simulated genotype and  
349 phenotype datasets for the 5 replicates of each scenario are provided in Files S3, S4, and S5.  
350 All files were uploaded to Figshare.

351

## Multi-population genomic prediction

352

### RESULTS

#### 353 **Genomic prediction accuracy of separate and joint analyses**

354 Joint analysis increased genomic prediction accuracy in comparison to separate  
355 analyses. This is shown in Table 1. Analysing separately the four datasets gave accuracies of  
356 about 0.71 (low diversity) and 0.53 (high diversity) with single phenotype records, and of about  
357 0.73 (low diversity) with weighted phenotype records. Analysing jointly the four datasets  
358 increased accuracy by 0.09 absolute points with single phenotype records and by 0.12 absolute  
359 points with weighted phenotype records.

#### 360 **Integration based on PEC, partial PEC, or PEV matrices**

361 For all scenarios the developed method enabled exact integration when complete PEC  
362 matrices were used. Integration of estimated allele substitution effects by means of the complete  
363 PEC matrix led to the same estimated genetic values as with the joint analysis, as shown by  
364 correlation and regression coefficients of 1, and MSE close to 0 (Figures 1-6; Figures S1-S6).  
365 For comparison, correlations between estimated genetic values from separate analyses and joint  
366 estimated genetic values were about 0.87 (low diversity) and 0.77 (high diversity) with single  
367 phenotype records, and 0.85 (low diversity) with weighted phenotype records.

368 Approximate integration by means of partial PEC matrices for each chromosome, that  
369 is ignoring PEC between markers on different chromosomes, gave almost as accurate and  
370 calibrated estimated genetic values as the exact integration. This is illustrated in Figures 1-6  
371 with correlations higher than 0.96, regression coefficients close to 1, and MSE close to 0.  
372 Increasing the diversity slightly deteriorated accuracy and calibration of genomic predictions  
373 (Figures 1-3; Figures S1-S3).

## Multi-population genomic prediction

374           Approximate integrations by means of PEV matrices, that is ignoring PEC between all  
375 markers, gave quite accurate, but uncalibrated estimated genetic values. This is shown in  
376 Figures 1-6 and in Figures S1-S6. Correlations between joint estimated genetic values and  
377 estimated genetic values with integration by means of PEV were between 0.95 and 0.98 with  
378 single phenotype records and between 0.93 and 0.95 with weighted phenotype records. Despite  
379 these correlations close to 1, estimated genetic values were uncalibrated, as depicted by  
380 regression coefficients below 0.77 for the low diversity scenarios with single and weighted  
381 phenotype records, and below 0.86 for the high diversity scenario with single phenotype records  
382 (Figures 2, 5, S2, S5).

### 383 **Integration based on PEV, allele frequencies, and LD information**

384           When LD information was derived from training data of other populations, approximate  
385 integrations by means of PEV, allele frequencies, and LD information, resulted in highly  
386 accurate and well calibrated estimated genetic values with single phenotype records. This is  
387 shown in Figures 1-3 (Figures S1-S3). Correlation and regression coefficients were equal to 1  
388 for the low diversity scenario. Slightly lower values, but still close to 1, were observed for the  
389 high diversity scenario. For both low and high diversity scenarios, MSE were close to 0. In  
390 contrast, when LD information was derived from validation data of other populations,  
391 approximate integrations gave less accurate and well calibrated estimated genetic values. This  
392 is shown in Figures 3-6 (Figures S3-S6). For these scenarios, correlations were equal to at least  
393 0.94, and regression coefficients varied between 0.87 and 1.05.

394           For the scenario with weighted phenotype records, approximate integrations by means  
395 of LD information from training data of other populations resulted in highly accurate and well  
396 calibrated estimated genetic values when sets of markers per chromosome were used to estimate  
397 the effective number of records for each marker. Correlations between joint estimated genetic

## Multi-population genomic prediction

398 values and estimated genetic values with integration were about 0.99 (Figure 4, Figure S4),  
399 regression coefficients were about 0.95 (Figure 5, Figure S5), and MSE were close to 0 (Figure  
400 6, Figure S6). Using LD information from the validation data of other populations, instead from  
401 the training data of other populations, gave slightly less accurate (correlations higher than 0.95),  
402 and moderately less calibrated estimated genetic values (regression coefficients between 0.87  
403 and 1.04; Figure 4-6; Figures S4-S6). For both cases, estimating the effective numbers of  
404 records per marker, instead of for all markers per chromosome simultaneously, reduced  
405 accuracy and calibration of estimated genetic values (Figure 4-5; Figures S4-S5).

### 406 **Comparison of estimated allele substitution effects**

407 Correlation and regression coefficients between estimated allele substitution effects  
408 from the joint analysis and analysis with integration largely followed patterns of the  
409 corresponding values for estimated genetic values (Tables 2-3). Correlation and regression  
410 coefficients were close to 1 when the integration of estimated allele substitution effects was by  
411 means of the complete PEC matrices. Ignoring PEC between markers on different  
412 chromosomes, or ignoring PEC between all markers, reduced correlations to between 0.92 and  
413 0.99 (Tables 2-3). Using LD information with PEV led to correlations between joint estimates  
414 of allele substitution effects and estimates with integration ranging from 0.71 to 0.83 for the  
415 scenario with weighted phenotype records (Tables 2-3).

416

## Multi-population genomic prediction

417

### DISCUSSION

418           The results show that the developed method enables accurate and well calibrated  
419 estimated genetic values for complex traits using both individual-level data and summary  
420 statistics. As expected from theory, the analysis of individual-level data and estimated allele  
421 substitution effects from other analyses by means of PEC matrices, yielded the same estimates  
422 as the joint analysis of all individual-level data. To our knowledge, this is the first time that  
423 individual-level data and summary statistics were analysed simultaneously for genomic  
424 predictions. As illustrated by simulations, the combined analysis of multiple datasets may  
425 increase genomic prediction accuracy over separate analyses of a single dataset. Unfortunately,  
426 combining individual-level data from several sources is generally not feasible for several  
427 reasons, e.g., political roadblocks, data protections concerns, or data inconsistencies (Powell  
428 and Sieber, 1992; Vilhjálmsson et al., 2015; Maier et al., 2018). However, summary statistics,  
429 such as estimates of allele substitution effects and associated measures of accuracy (e.g., PEV),  
430 are usually available for exchange. The developed method enables increase in genomic  
431 prediction accuracy of complex traits by means of jointly analysing the available individual-  
432 level data and summary statistics.

433           Accurate integration of estimated allele substitution effects is possible also when the  
434 complete PEC matrix is not available. This is important because computing the exact PEC  
435 matrix and exchanging it between analyses might be challenging in some cases. For the vast  
436 majority of used marker arrays in animal and plant breeding the calculations and data transfers  
437 should be doable. For example, most arrays have between 10,000 and 100,000 markers, for  
438 which we need between ~1 and ~80 GB of memory to store the PEC matrix and between a  
439 minute and a day to invert it on current computers. For a larger number of markers, commonly  
440 used in human genetics, the memory requirements and computing time become prohibitive. The  
441 results show that in such cases we can still obtain accurate genomic predictions when the

## Multi-population genomic prediction

442 integration is done by means of partial PEC matrices for each chromosome. This is expected  
443 since high LD between markers mostly occurs within chromosomes. High LD between markers  
444 on different chromosomes may especially occur in structured populations and populations  
445 under selection (Farnir et al., 2000; Flint-Garcia et al., 2003; Rostoks et al., 2006). Both of these  
446 conditions are present in breeding populations. However, the results suggest that LD between  
447 chromosomes can be ignored for the purpose of integration for populations with both low and  
448 high diversity. The results also show that we can successfully integrate estimated allele  
449 substitution effects when only PEV and allele frequencies from each population are available  
450 together with LD information of a reference genotype panel representative of each population.  
451 Assuming that such reference genotype panels are available, only estimated allele substitution  
452 effects, associated PEV, and allele frequencies need to be exchanged between populations for  
453 such analyses. Similar conclusions were drawn from studies combining only summary statistics  
454 obtained from genome-wide association studies to perform multi-trait genomic predictions  
455 (Maier et al., 2018).

456 Accurate integration of estimated allele substitution effects is possible irrespective of  
457 the diversity of the populations and characteristics of genotypes (e.g., allele frequencies, LD).  
458 This is obvious, and confirmed by our results, when integration is performed by means of  
459 complete PEC matrices. When complete PEC matrices are unavailable, accurate integration is  
460 possible if the inverses of the PEC matrices can be approximated accurately from available  
461 population parameters (i.e. LD and allele frequency information), whatever the level of  
462 diversity and characteristics of the populations, as shown by our results or a study combining  
463 summary statistics in human genetics (Maier et al., 2018). In our study, the population  
464 parameters obtained from the reference panels adequately reflected the characteristics of the  
465 training sets. Future studies should be conducted to assess the impact of suboptimal reference

## Multi-population genomic prediction

466 panels. Therefore, the developed method is expected to perform well on any type of data, from  
467 animal and plant breeding to human genetics, provided accurate information is available.

468         The developed method has some simplifying assumptions that can be readily relaxed.  
469 For example, we assumed that the same genotype coding was used in all populations. This  
470 assumption can be relaxed when centered genotype coding (i.e., of the form of  $(\mathbf{W}_i - \mathbf{1}\mathbf{v}_i')$ ) is  
471 used because variance component estimates, estimates of allele substitution effects and PEC  
472 are the same irrespective of the centering of the genotype coding, provided that the model has  
473 a fixed general mean, which is considered in the integration (Strandén and Christensen, 2011).  
474 Also, centered and scaled (standardised) genotype coding is often used in human genetics,  
475 instead of only centered genotype coding (Yang et al., 2010; Speed et al., 2012; Maier et al.,  
476 2018). In practice, estimated genetic values are not influenced by scaling of centered genotype  
477 coding (Strandén and Christensen, 2011; Bouwman et al., 2017). Therefore, allele substitution  
478 effects estimated using one type of genotype scaling could be obtained from a post-analysis by  
479 converting estimated genetic values computed for a reference genotype panel into allele  
480 substitution effects for another genotype scaling. Converting estimated genetic values into  
481 allele substitution effects is often referred to as back-solving of allele substitution effects  
482 (Strandén and Garrick, 2009; Strandén and Christensen, 2011; Wang et al., 2012; Bouwman et  
483 al., 2017). Prediction error covariances associated with the converted estimated allele  
484 substitution effects could be derived from the (prediction error) covariances of the estimated  
485 genetic values (see derivations in Appendix A4).

486         Allele substitution effects estimated from analyses using different different sets of  
487 markers or different residual variances, can be used in the integration as well. The assumption  
488 that all individuals were genotyped at the same loci could be considered as fulfilled if small  
489 differences in the sets of markers are corrected by assuming zero allele substitution effect and  
490 zero accuracy for markers not used in an analysis. When large differences between sets of

## Multi-population genomic prediction

491 markers are observed, this assumption can be accommodated following two approaches. A first,  
 492 post-analysis, approach consists of assuming that estimated genetic values are the same for two  
 493 different sets of markers, allowing the conversion of estimated allele substitution effects from  
 494 one set of markers to another set of markers (Liu and Goddard, 2018). The conversion can be  
 495 performed by back-solving estimated allele substitution effects from estimated genetic values,  
 496 as proposed previously for different genotype codings, or by applying a marker model to the  
 497 estimated genetic values with the reference set of markers (Liu and Goddard, 2018). A second  
 498 approach consists of harmonizing genotype data across populations. This approach must be  
 499 performed before the analyses, and requires therefore coordination between populations.  
 500 Harmonization of genotype data could be performed by identifying a subset of markers for  
 501 which all populations are genotyped, or by genotype imputation (e.g., Marchini and Howie,  
 502 2010). Finally, the assumption that residual variances were the same in all populations, can be  
 503 relaxed by noting that separate estimates of allele substitution effects  $\widehat{\alpha}_i^*$ , obtained by the system  
 504 of equations (2), can be also obtained by the following different formulations:

$$\begin{aligned}
 \widehat{\alpha}_i^* &= (\mathbf{W}_i' \mathbf{Z}_i' \mathbf{M}_i \sigma_{e_i}^2 \mathbf{Z}_i \mathbf{W}_i + \mathbf{B}_i^{-1} \sigma_{\alpha_i}^{-2})^{-1} \mathbf{W}_i' \mathbf{Z}_i' \mathbf{M}_i \sigma_{e_i}^2 \mathbf{y}_i \\
 &= (\mathbf{W}_i' \mathbf{Z}_i' \mathbf{M}_i \mathbf{Z}_i \mathbf{W}_i + \mathbf{B}_i^{-1} \lambda)^{-1} \mathbf{W}_i' \mathbf{Z}_i' \mathbf{M}_i \mathbf{y}_i \\
 &= (\mathbf{W}_1' \mathbf{Z}_1' \mathbf{M}_1 \sigma_{e_f}^{-2} \mathbf{Z}_i \mathbf{W}_i + \mathbf{B}_1^{-1} \lambda \sigma_{e_f}^{-2})^{-1} \mathbf{W}_1' \mathbf{Z}_1' \mathbf{M}_1 \sigma_{e_f}^{-2} \mathbf{y}_i
 \end{aligned}$$

506 where  $\sigma_{e_i}^2$  ( $\sigma_{e_f}^2$ ) is the residual variance used for the  $i$ -th (focal) analysis, and  $\lambda = \sigma_{e_i}^2 \sigma_{\alpha_i}^{-2}$ .

507 For integration of  $\widehat{\alpha}_i^*$ ,  $(PEC(\widehat{\alpha}_i^*))^{-1}$  must be approximated using the residual variance of the  
 508 focal population ( $\sigma_{e_f}^2$ ) and the effective numbers of records per marker estimated using variance  
 509 components of the  $i$ -th analysis. Another way to relax this assumption is to extend our univariate  
 510 model to a bivariate model, similarly to methods developed to combine different genetic  
 511 evaluations in animal breeding (Schaeffer, 1994; Vandenplas et al., 2015). In a bivariate model,  
 512 one trait would represent individual-level data, while the other trait would represent summary



## Multi-population genomic prediction

513 statistics. The genetic correlation between the two traits could be estimated based on a subset  
514 of individual-level data available for both datasets or based on summary statistics (Bulik-  
515 Sullivan et al., 2015). Such an approach would also allow the integration of summary  
516 statistics expressed on a different scale (e.g., different measure units, trait definitions) than the  
517 scale of the focal population (Vandenplas et al., 2015).

518         The developed method can be readily generalized to multi-trait models and is therefore  
519 a generalization of previous works that were based on several (implicit) assumptions (Liu and  
520 Goddard, 2018; Maier et al., 2018). For example, previous works assumed that no individual-  
521 level data were available. It was also (implicitly) assumed that only single phenotype records  
522 with homogeneous residual variance (Maier et al., 2018), or that the least-squares part of the  
523 separate analyses (Liu and Goddard, 2018), were available for integrating estimated allele  
524 substitution effects. Both assumptions lead to simple and accurate approximations of PEC  
525 matrices as shown in our study. However, we relax all these assumptions, such that our method  
526 can jointly analyse individual-level data and summary statistics, with possibly multiple  
527 phenotype records per individual.

528

## Multi-population genomic prediction

529

### CONCLUSIONS

530           We developed a method for genomic prediction that accurately integrates summary  
531 statistics obtained from analyses of separate populations into an analysis of individual-level  
532 data. The method accommodates use of multiple phenotype (pseudo-)records per individual,  
533 and further extensions have been presented to accommodate for differences in residual  
534 variances or genotype codings used in the populations. When complete summary statistics  
535 information is available the method gives identical genomic predictions as the joint analysis of  
536 individual-level data from all populations. When summary statistics information is not  
537 complete we can use a series of approximations that give very accurate and well calibrated  
538 genomic predictions.

539

## Multi-population genomic prediction

540

### ACKNOWLEDGMENTS

541           This study was financially supported by the Dutch Ministry of Economic Affairs (TKI  
542 Agri & Food project 16022), the Breed4Food partners Cobb Europe, CRV, Hendrix Genetics  
543 and Topigs Norsvin, and UK Biotechnology and Biological Sciences Research Council  
544 (BBSRC) ISPG to The Roslin Institute BBS/E/D/30002275. The use of the HPC cluster has  
545 been made possible by CAT-AgroFood (Shared Research Facilities Wageningen UR).

546

## Multi-population genomic prediction

547

### LITERATURE CITED

- 548 Bouwman, A.C., B.J. Hayes, and M.P.L. Calus. 2017. Estimated allele substitution effects  
549 underlying genomic evaluation models depend on the scaling of allele counts. *Genet.*  
550 *Sel. Evol.* 49. doi:10.1186/s12711-017-0355-9.
- 551 Bulik-Sullivan, B., H.K. Finucane, V. Anttila, A. Gusev, F.R. Day, P.-R. Loh, ReproGen  
552 Consortium, Psychiatric Genomics Consortium, Genetic Consortium for Anorexia  
553 Nervosa of the Wellcome Trust Case Control Consortium 3, L. Duncan, J.R.B. Perry,  
554 N. Patterson, E.B. Robinson, M.J. Daly, A.L. Price, and B.M. Neale. 2015. An atlas of  
555 genetic correlations across human diseases and traits. *Nat. Genet.* 47:1236–1241.  
556 doi:10.1038/ng.3406.
- 557 Burden, R.L., and J.D. Faires. 2010. *Numerical Analysis*. 9 edition. Brooks Cole, Boston,  
558 MA.
- 559 Campos, G. de los, D. Gianola, and D.B. Allison. 2010. Predicting genetic predisposition in  
560 humans: the promise of whole-genome markers. *Nat. Rev. Genet.* 11:880–886.  
561 doi:10.1038/nrg2898.
- 562 de los Campos, G., J.M. Hickey, R. Pong-Wong, H.D. Daetwyler, and M.P.L. Calus. 2012.  
563 Whole-genome regression and prediction methods applied to plant and animal  
564 breeding. *Genetics* 193:327–345. doi:10.1534/genetics.112.143313.
- 565 Daetwyler, H.D., B. Villanueva, and J.A. Woolliams. 2008. Accuracy of predicting the  
566 genetic risk of disease using a genome-wide approach. *PLoS ONE* 3.

## Multi-population genomic prediction

- 567 Damesa, T.M., J. Möhring, M. Worku, and H.-P. Piepho. 2017. One step at a time: Stage-wise  
568 analysis of a series of experiments. *Agron. J.* 109:845–857.  
569 doi:10.2134/agronj2016.07.0395.
- 570 Dempfle, L. 1977. Relation entre BLUP (Best Linear Unbiased Prediction) et estimateurs  
571 bayésiens. *Genet. Sel. Evol.* 9:27–32.
- 572 Farnir, F., W. Coppieters, J.-J. Arranz, P. Berzi, N. Cambisano, B. Grisart, L. Karim, F.  
573 Marcq, L. Moreau, M. Mni, C. Nezer, P. Simon, P. Vanmanshoven, D. Wagenaar, and  
574 M. Georges. 2000. Extensive genome-wide linkage disequilibrium in cattle. *Genome*  
575 *Res.* 10:220–227. doi:10.1101/gr.10.2.220.
- 576 Faux, A.-M., G. Gorjanc, R.C. Gaynor, M. Battagin, S.M. Edwards, D.L. Wilson, S.J. Hearne,  
577 S. Gonen, and J.M. Hickey. 2016. AlphaSim: Software for breeding program  
578 simulation. *Plant Genome* 9.
- 579 Fisher, R.A. 1918. The correlation between relatives on the supposition of Mendelian  
580 inheritance. *Philos. Trans. R. Soc. Edinb.* 52:399–433.
- 581 Flint-Garcia, S.A., J.M. Thornsberry, and E.S. Buckler. 2003. Structure of linkage  
582 disequilibrium in plants. *Annu. Rev. Plant Biol.* 54:357–374.  
583 doi:10.1146/annurev.arplant.54.031902.134907.
- 584 Garrick, D.J., J.F. Taylor, and R.L. Fernando. 2009. Deregressing estimated breeding values  
585 and weighting information for genomic regression analyses. *Genet. Sel. Evol.* 41:55.  
586 doi:10.1186/1297-9686-41-55.
- 587 Gianola, D., and R.L. Fernando. 1986. Bayesian methods in animal breeding theory. *J. Anim.*  
588 *Sci.* 63:217–244.

## Multi-population genomic prediction

- 589 Henderson, C.R. 1984. Applications of Linear Models in Animal Breeding. 2nd ed.  
590 University of Guelph, Guelph, ON, Canada.
- 591 Hickey, J.M., and G. Gorjanc. 2012. Simulated data for genomic selection and genome-wide  
592 association studies using a combination of coalescent and gene drop methods. *G3*  
593 2:425–427. doi:10.1534/g3.1111.001297.
- 594 Hoerl, A.E., and R.W. Kennard. 1976. Ridge regression iterative estimation of the biasing  
595 parameter. *Commun. Stat. - Theory Methods* 5:77–88.  
596 doi:10.1080/03610927608827333.
- 597 Hozé, C., S. Fritz, F. Phocas, D. Boichard, V. Ducrocq, and P. Croiseau. 2014. Efficiency of  
598 multi-breed genomic selection for dairy cattle breeds with different sizes of reference  
599 population. *J. Dairy Sci.* 97:3918–3929. doi:10.3168/jds.2013-7761.
- 600 Jairath, L., J.C.M. Dekkers, L.R. Schaeffer, Z. Liu, E.B. Burnside, and B. Kolstad. 1998.  
601 Genetic evaluation for herd life in Canada. *J. Dairy Sci.* 81:550–562.
- 602 Legarra, A., J.K. Bertrand, T. Strabel, R.L. Sapp, J.P. Sanchez, and I. Misztal. 2007. Multi-  
603 breed genetic evaluation in a Gelbvieh population. *J. Anim. Breed. Genet.* 124:286–  
604 295.
- 605 Lindley, D.V., and A.F.M. Smith. 1972. Bayes estimates for the linear model. *J. R. Stat. Soc.*  
606 *Ser. B Methodol.* 34:1–41.
- 607 Liu, Z., and M.E. Goddard. 2018. A SNP MACE model for international genomic evaluation:  
608 technical challenges and possible solutions. Page 11.393 in *Proceedings of the 11th*  
609 *World Congress on Genetics Applied to Livestock Production, Auckland, New*  
610 *Zeland.*

## Multi-population genomic prediction

- 611 MacLeod, I.M., D.M. Larkin, H.A. Lewin, B.J. Hayes, and M.E. Goddard. 2013. Inferring  
612 demography from runs of homozygosity in whole-genome sequence, with correction  
613 for sequence errors. *Mol. Biol. Evol.* 30:2209–2223.
- 614 Maier, R.M., Z. Zhu, S.H. Lee, M. Trzaskowski, D.M. Ruderfer, E.A. Stahl, S. Ripke, N.R.  
615 Wray, J. Yang, P.M. Visscher, and M.R. Robinson. 2018. Improving genetic  
616 prediction by leveraging genetic correlations among human diseases and traits. *Nat.*  
617 *Commun.* 9:989.
- 618 Marchini, J., and B. Howie. 2010. Genotype imputation for genome-wide association studies.  
619 *Nat. Rev. Genet.* 11:499–511. doi:10.1038/nrg2796.
- 620 Meuwissen, T.H.E., B.J. Hayes, and M.E. Goddard. 2001. Prediction of total genetic value  
621 using genome-wide dense marker maps. *Genetics* 157:1819–1829.
- 622 Misztal, I., and G.R. Wiggans. 1988. Approximation of prediction error variance in large-  
623 scale animal models. *J. Dairy Sci.* 71(Suppl. 2):27–32.
- 624 Oakey, H., B. Cullis, R. Thompson, J. Comadran, C. Halpin, and R. Waugh. 2016. Genomic  
625 selection in multi-environment crop trials. *G3 Bethesda Md* 6:1313–1326.  
626 doi:10.1534/g3.116.027524.
- 627 Pasaniuc, B., and A.L. Price. 2017. Dissecting the genetics of complex traits using summary  
628 association statistics. *Nat. Rev. Genet.* 18:117–127. doi:10.1038/nrg.2016.142.
- 629 Powell, R.L., and H.D. Norman. 1998. Use of multinational data to improve national  
630 evaluations of Holstein bulls. *J. Dairy Sci.* 81:2257–2263. doi:10.3168/jds.S0022-  
631 0302(98)75805-9.

## Multi-population genomic prediction

- 632 Powell, R.L., and M. Sieber. 1992. Direct and indirect conversion of bull evaluations for yield  
633 traits between countries. *J. Dairy Sci.* 75:1138–1146.
- 634 Quaas, R.L., and Z. Zhang. 2006. Multiple-breed genetic evaluation in the US beef cattle  
635 context: Methodology. Page CD-ROM Comm. 24-12 in Proceedings of the 8th World  
636 Congress on Genetics Applied to Livestock Production, Belo Horizonte, Brazil.
- 637 Rogers, A.R., and C. Huff. 2009. Linkage Disequilibrium Between Loci With Unknown  
638 Phase. *Genetics* 182:839–844. doi:10.1534/genetics.108.093153.
- 639 Rostoks, N., L. Ramsay, K. MacKenzie, L. Cardle, P.R. Bhat, et al. 2006. Recent history of  
640 artificial outcrossing facilitates whole-genome association mapping in elite inbred  
641 crop varieties. *Proc. Natl. Acad. Sci. U. S. A.* 103:18656–18661.  
642 doi:10.1073/pnas.0606133103.
- 643 Schaeffer, L.R. 1994. Multiple-country comparison of dairy sires. *J. Dairy Sci.* 77:2671–2678.
- 644 Schulthess, A.W., Y. Wang, T. Miedaner, P. Wilde, J.C. Reif, and Y. Zhao. 2016. Multiple-  
645 trait- and selection indices-genomic predictions for grain yield and protein content in  
646 rye for feeding purposes. *TAG Theor. Appl. Genet. Theor. Angew. Genet.* 129:273–  
647 287. doi:10.1007/s00122-015-2626-6.
- 648 Schulz-Streeck, T., J.O. Ogutu, and H.-P. Piepho. 2013. Comparisons of single-stage and two-  
649 stage approaches to genomic selection. *Theor. Appl. Genet.* 126:69–82.  
650 doi:10.1007/s00122-012-1960-1.
- 651 Speed, D., G. Hemani, M.R. Johnson, and D.J. Balding. 2012. Improved heritability  
652 estimation from genome-wide SNPs. *Am. J. Hum. Genet.* 91:1011–1021.  
653 doi:10.1016/j.ajhg.2012.10.010.



## Multi-population genomic prediction

- 654 Strandén, I., and O.F. Christensen. 2011. Allele coding in genomic evaluation. *Genet. Sel.*  
655 *Evol.* 43:25. doi:10.1186/1297-9686-43-25.
- 656 Strandén, I., and D.J. Garrick. 2009. Technical note: Derivation of equivalent computing  
657 algorithms for genomic predictions and reliabilities of animal merit. *J. Dairy Sci.*  
658 92:2971–2975. doi:10.3168/jds.2008-1929.
- 659 Vandenplas, J., F.G. Colinet, G. Glorieux, C. Bertozzi, and N. Gengler. 2015. Integration of  
660 external estimated breeding values and associated reliabilities using correlations  
661 among traits and effects. *J. Dairy Sci.* 98:9044–9050. doi:10.3168/jds.2015-9894.
- 662 Vandenplas, J., and N. Gengler. 2012. Comparison and improvements of different Bayesian  
663 procedures to integrate external information into genetic evaluations. *J. Dairy Sci.*  
664 95:1513–1526.
- 665 VanRaden, P.M. 2008. Efficient methods to compute genomic predictions. *J. Dairy Sci.*  
666 91:4414–4423. doi:10.3168/jds.2007-0980.
- 667 Vilhjálmsson, B.J., J. Yang, H.K. Finucane, A. Gusev, S. Lindström, et al. 2015. Modeling  
668 linkage disequilibrium increases accuracy of polygenic risk scores. *Am. J. Hum.*  
669 *Genet.* 97:576–592. doi:10.1016/j.ajhg.2015.09.001.
- 670 Wang, H., I. Misztal, I. Aguilar, A. Legarra, and W.M. Muir. 2012. Genome-wide association  
671 mapping including phenotypes from relatives without genotypes. *Genet. Res.* 94:73–  
672 83. doi:10.1017/S0016672312000274.
- 673 Whittaker, J.C., R. Thompson, and M.C. Denham. 2000. Marker-assisted selection using ridge  
674 regression. *Genet. Res.* 75:249–252.

## Multi-population genomic prediction

- 675 Wientjes, Y.C.J., P. Bijma, R.F. Veerkamp, and M.P.L. Calus. 2016. An equation to predict  
676 the accuracy of genomic values by combining data from multiple traits, populations,  
677 or environments. *Genetics* 202:799–823. doi:10.1534/genetics.115.183269.
- 678 Wray, N.R., J. Yang, B.J. Hayes, A.L. Price, M.E. Goddard, and P.M. Visscher. 2013. Pitfalls  
679 of predicting complex traits from SNPs. *Nat. Rev. Genet.* 14:507–515.  
680 doi:10.1038/nrg3457.
- 681 Yang, J., B. Benyamin, B.P. McEvoy, S. Gordon, A.K. Henders, et al. 2010. Common SNPs  
682 explain a large proportion of the heritability for human height. *Nat. Genet.* 42:565–  
683 569. doi:10.1038/ng.608.
- 684 Yang, J., T. Ferreira, A.P. Morris, S.E. Medland, G.I. of An.T. (GIANT) Consortium, et al.  
685 2012. Conditional and joint multiple-SNP analysis of GWAS summary statistics  
686 identifies additional variants influencing complex traits. *Nat. Genet.* 44:369–375.  
687 doi:10.1038/ng.2213.
- 688
- 689

## Multi-population genomic prediction

690 **Table 1** – Genomic prediction accuracy for joint and separate analyses in scenarios with  
691 single or weighted phenotype records and low or high diversity (values are averages across  
692 the five replicates<sup>1</sup>)

| Phenotypes | Diversity | Analysis | Populations |       |       |       |
|------------|-----------|----------|-------------|-------|-------|-------|
|            |           |          | A           | B     | C     | D     |
| Single     | Low       | Joint    | 0.811       | 0.811 | 0.823 | 0.815 |
|            |           | Separate | 0.705       | 0.708 | 0.718 | 0.718 |
|            | High      | Joint    | 0.687       | 0.686 | 0.687 | 0.684 |
|            |           | Separate | 0.536       | 0.537 | 0.528 | 0.528 |
| Weighted   | Low       | Joint    | 0.860       | 0.865 | 0.865 | 0.862 |
|            |           | Separate | 0.720       | 0.739 | 0.724 | 0.727 |

693 <sup>1</sup> Standard errors are between 0.003 and 0.016.

694

695

## Multi-population genomic prediction

696 **Table 2** - Comparison of estimated allele substitution effects from different analyses with  
697 estimates from the joint statistical analysis using single phenotype records in scenarios with  
698 low and high diversity (values are averages across the five replicates<sup>1</sup>)

| Analysis                         | Low diversity |            | High diversity |            |
|----------------------------------|---------------|------------|----------------|------------|
|                                  | Correlation   | Regression | Correlation    | Regression |
| Separate A                       | 0.71          | 1.09       | 0.65           | 1.10       |
| Separate B                       | 0.71          | 1.09       | 0.65           | 1.10       |
| Separate C                       | 0.71          | 1.09       | 0.65           | 1.11       |
| Separate D                       | 0.71          | 1.09       | 0.64           | 1.10       |
| PEC                              | 1.00          | 1.00       | 1.00           | 1.00       |
| PEC <sub>within chromosome</sub> | 0.99          | 0.98       | 0.97           | 0.95       |
| PEV                              | 0.96          | 0.80       | 0.96           | 0.89       |
| LD <sub>training</sub>           | 1.00          | 1.00       | 0.98           | 0.97       |
| LD <sub>validation</sub>         | 0.96          | 0.88       | 0.93           | 0.84       |

699 <sup>1</sup> Standard errors are between 0.00 and 0.01.

700

## Multi-population genomic prediction

701 **Table 3** - Comparison of estimated allele substitution effects from different analyses with  
702 estimates from the joint statistical analysis using weighted phenotype records in the scenario  
703 with low diversity (values are averages across the five replicates with standard errors between  
704 brackets)

| Analysis                                | Correlation | Regression  |
|-----------------------------------------|-------------|-------------|
| Separate A                              | 0.61 (0.10) | 0.88 (0.13) |
| Separate B                              | 0.58 (0.15) | 0.62 (0.12) |
| Separate C                              | 0.56 (0.12) | 0.93 (0.23) |
| Separate D                              | 0.33 (0.08) | 0.65 (0.18) |
| PEC                                     | 1.00 (0.00) | 0.99 (0.01) |
| PEC <sub>within chromosome</sub>        | 0.96 (0.01) | 1.01 (0.02) |
| PEV                                     | 0.92 (0.02) | 0.80 (0.05) |
| LD <sub>training</sub> (1 marker)       | 0.77 (0.09) | 0.83 (0.10) |
| LD <sub>training</sub> (1 chromosome)   | 0.83 (0.09) | 0.95 (0.11) |
| LD <sub>validation</sub> (1 marker)     | 0.73 (0.11) | 0.75 (0.13) |
| LD <sub>validation</sub> (1 chromosome) | 0.71 (0.15) | 0.74 (0.18) |

705

706

## Multi-population genomic prediction

707

### FIGURES

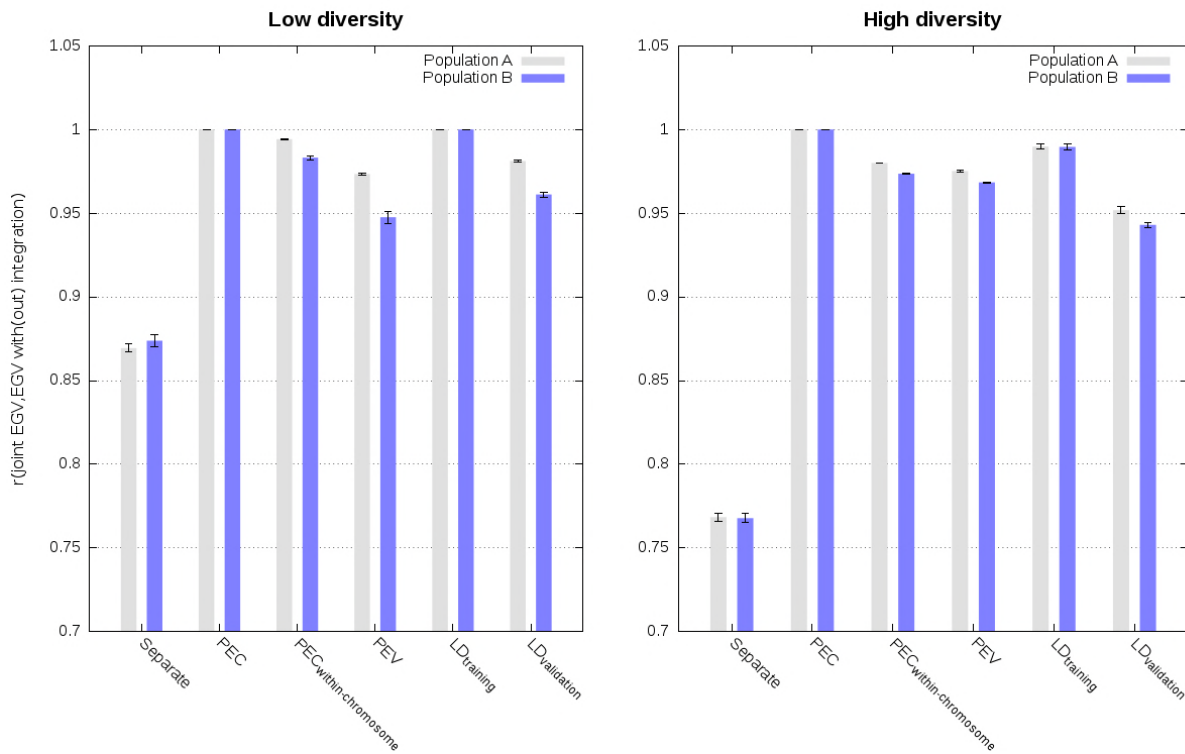

708

709 **Figure 1 - Correlation between estimated genetic values (EGV) from the joint analysis**  
710 **and from different analyses in populations A and B using a single phenotype record per**  
711 **individual in scenarios with low and high diversity (values are averages across the five**  
712 **replicates with standard errors).**

713

## Multi-population genomic prediction

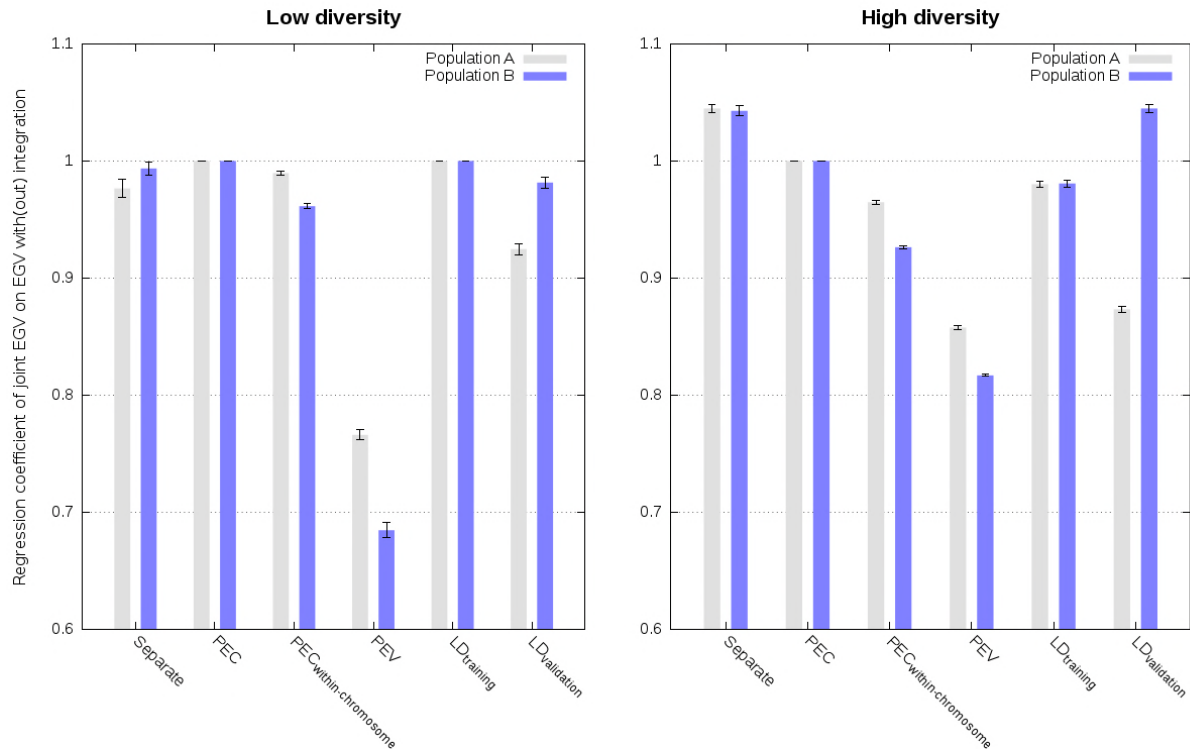

714

715 **Figure 2 – Regression of estimated genetic values (EGV) from the joint analysis on**  
716 **estimated genetic values from different analyses in populations A and B using a single**  
717 **phenotype record per individual in scenarios with low and high diversity (values are**  
718 **averages across the five replicates with standard errors).**

719

### Multi-population genomic prediction

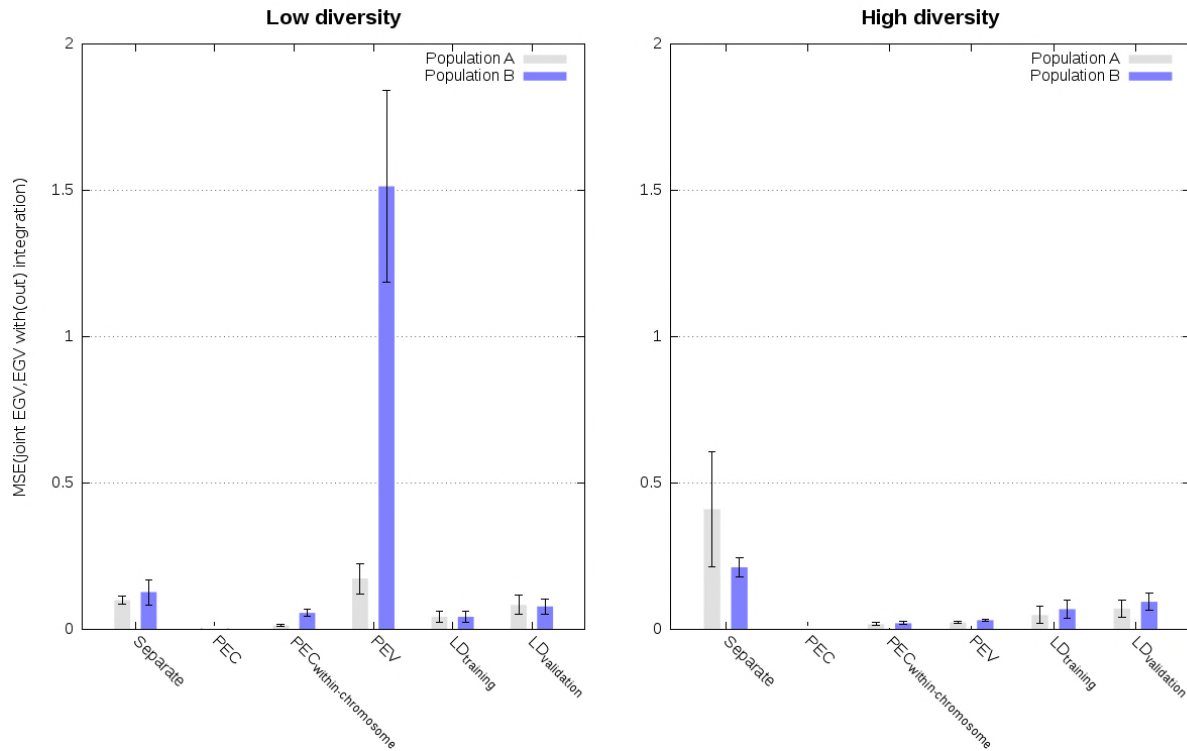

720

721 **Figure 3 - Mean square errors between joint estimated genetic values (EGV) from the**  
722 **joint analysis and from different analyses in populations A and B using a single**  
723 **phenotype record per individual in scenarios with low and high diversity (values are**  
724 **averages across the five replicates with standard errors).**

725

726



## Multi-population genomic prediction

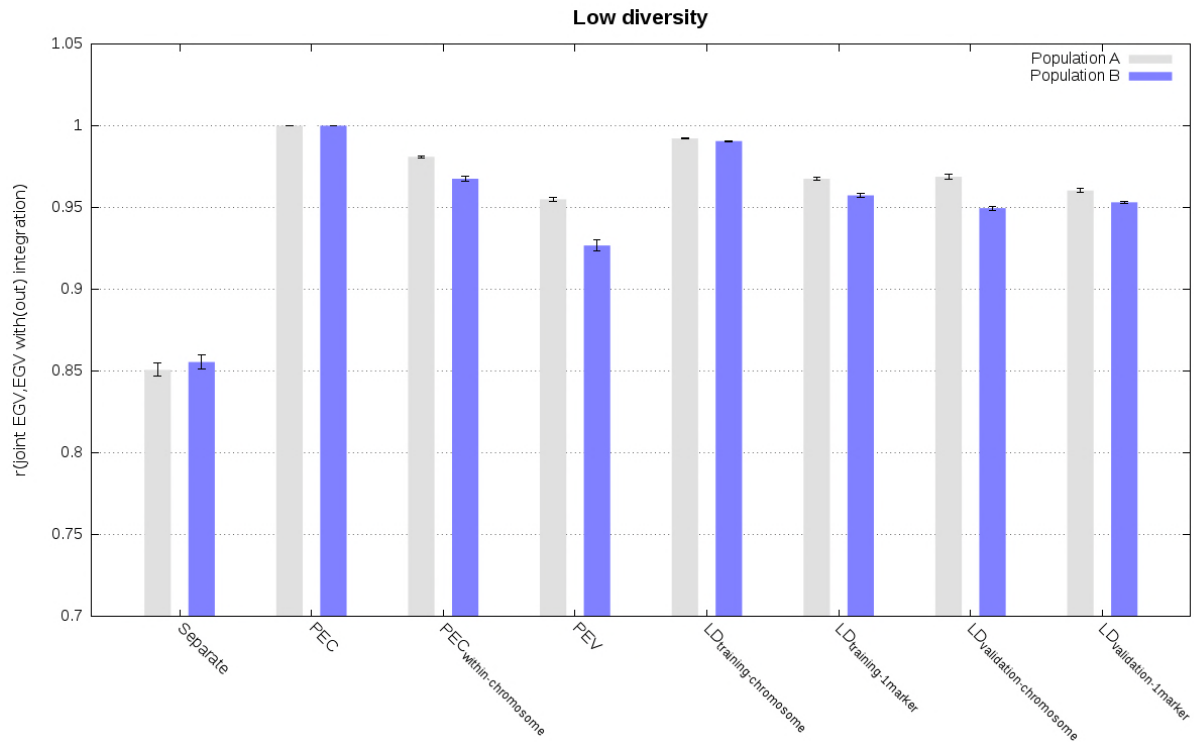

727

728 **Figure 4 - Correlation between estimated genetic values (EGV) from the joint analysis**  
729 **and from different analyses in populations A and B using weighted phenotype records in**  
730 **the scenario with low diversity (values are averages across the five replicates with**  
731 **standard errors).**

732

## Multi-population genomic prediction

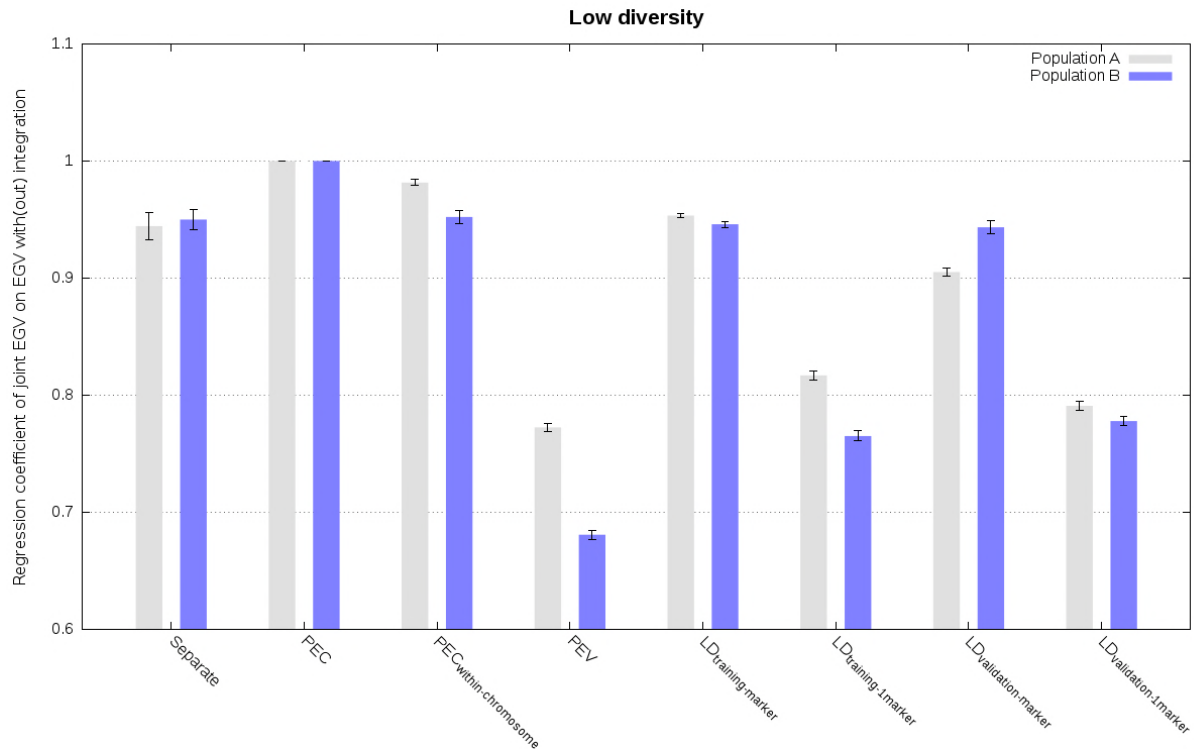

733

734 **Figure 5 - Regression of estimated genetic values (EGV) from the joint analysis on**  
735 **estimated genetic values from different analyses in populations A and B using weighted**  
736 **phenotype records in the scenario with low diversity (values are averages across the five**  
737 **replicates with standard errors).**

738

739

## Multi-population genomic prediction

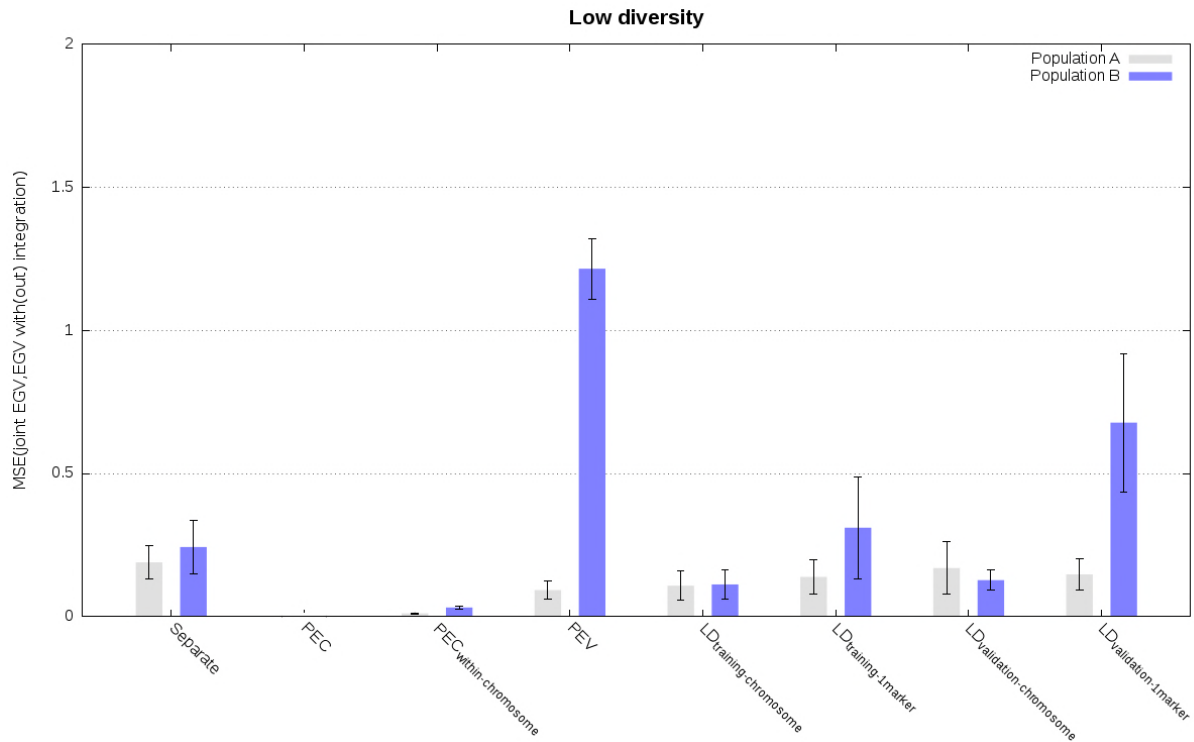

740

741 **Figure 6 - Mean square errors (SE) between estimated genetic values (EGV) from the**  
742 **joint analysis and from different analyses in populations A and B using weighted**  
743 **phenotype records in the scenario with low diversity (values are averages across the five**  
744 **replicates with standard errors).**

745

746

## Multi-population genomic prediction

### 747 **Appendix A1: Exact integration**

748 Here we detail the derivation of exact integration by means of absorbing the set of  
749 equations that pertain to one dataset. We start with the system of equations for separate analysis  
750 of dataset 1:

$$751 \begin{bmatrix} \mathbf{X}'_1 \mathbf{R}_1^{-1} \sigma_e^{-2} \mathbf{X}_1 & \mathbf{X}'_1 \mathbf{R}_1^{-1} \sigma_e^{-2} \mathbf{Z}_1 \mathbf{W}_1 \\ \mathbf{W}'_1 \mathbf{Z}'_1 \mathbf{R}_1^{-1} \sigma_e^{-2} \mathbf{X}_1 & \mathbf{W}'_1 \mathbf{Z}'_1 \mathbf{R}_1^{-1} \sigma_e^{-2} \mathbf{Z}_1 \mathbf{W}_1 + \mathbf{B}_1^{-1} \sigma_{\alpha_1}^{-2} \end{bmatrix} \begin{bmatrix} \widehat{\boldsymbol{\beta}}_1^* \\ \widehat{\boldsymbol{\alpha}}_1^* \end{bmatrix} = \begin{bmatrix} \mathbf{X}'_1 \mathbf{R}_1^{-1} \sigma_e^{-2} \mathbf{y}_1 \\ \mathbf{W}'_1 \mathbf{Z}'_1 \mathbf{R}_1^{-1} \sigma_e^{-2} \mathbf{y}_1 \end{bmatrix} \quad (\text{A1.1})$$

752 and the system of equations for the joint analysis of datasets 1 and 2:

$$753 \begin{bmatrix} \mathbf{X}'_1 \mathbf{R}_1^{-1} \sigma_e^{-2} \mathbf{X}_1 & \mathbf{0} & \mathbf{X}'_1 \mathbf{R}_1^{-1} \sigma_e^{-2} \mathbf{Z}_1 \mathbf{W}_1 \\ \mathbf{0} & \mathbf{X}'_2 \mathbf{R}_2^{-1} \sigma_e^{-2} \mathbf{X}_2 & \mathbf{X}'_2 \mathbf{R}_2^{-1} \sigma_e^{-2} \mathbf{Z}_2 \mathbf{W}_2 \\ \mathbf{W}'_1 \mathbf{Z}'_1 \mathbf{R}_1^{-1} \sigma_e^{-2} \mathbf{X}_1 & \mathbf{W}'_2 \mathbf{Z}'_2 \mathbf{R}_2^{-1} \sigma_e^{-2} \mathbf{X}_2 & \mathbf{W}'_1 \mathbf{Z}'_1 \mathbf{R}_1^{-1} \sigma_e^{-2} \mathbf{Z}_1 \mathbf{W}_1 + \mathbf{W}'_2 \mathbf{Z}'_2 \mathbf{R}_2^{-1} \sigma_e^{-2} \mathbf{Z}_2 \mathbf{W}_2 + \mathbf{B}_J^{-1} \sigma_{\alpha_J}^{-2} \end{bmatrix} \begin{bmatrix} \widehat{\boldsymbol{\beta}}_1 \\ \widehat{\boldsymbol{\beta}}_2 \\ \widehat{\boldsymbol{\alpha}} \end{bmatrix} =$$

$$754 \begin{bmatrix} \mathbf{X}'_1 \mathbf{R}_1^{-1} \sigma_e^{-2} \mathbf{y}_1 \\ \mathbf{X}'_2 \mathbf{R}_2^{-1} \sigma_e^{-2} \mathbf{y}_2 \\ \mathbf{W}'_1 \mathbf{Z}'_1 \mathbf{R}_1^{-1} \sigma_e^{-2} \mathbf{y}_1 + \mathbf{W}'_2 \mathbf{Z}'_2 \mathbf{R}_2^{-1} \sigma_e^{-2} \mathbf{y}_2 \end{bmatrix}. \quad (\text{A1.2})$$

755 From the first set of equations ( $\widehat{\boldsymbol{\beta}}_1$ ) in (A1.2) it follows:

$$756 \widehat{\boldsymbol{\beta}}_1 = (\mathbf{X}'_1 \mathbf{R}_1^{-1} \sigma_e^{-2} \mathbf{X}_1)^{-1} (\mathbf{X}'_1 \mathbf{R}_1^{-1} \sigma_e^{-2} \mathbf{y}_1 - \mathbf{X}'_1 \mathbf{R}_1^{-1} \sigma_e^{-2} \mathbf{Z}_1 \mathbf{W}_1 \widehat{\boldsymbol{\alpha}}). \quad (\text{A1.3}).$$

757 From the third set of equations ( $\widehat{\boldsymbol{\alpha}}$ ) in (A1.2) it follows:

$$758 \mathbf{W}'_1 \mathbf{Z}'_1 \mathbf{R}_1^{-1} \sigma_e^{-2} \mathbf{X}_1 \widehat{\boldsymbol{\beta}}_1 + \mathbf{W}'_2 \mathbf{Z}'_2 \mathbf{R}_2^{-1} \sigma_e^{-2} \mathbf{X}_2 \widehat{\boldsymbol{\beta}}_2 + (\mathbf{W}'_1 \mathbf{Z}'_1 \mathbf{R}_1^{-1} \sigma_e^{-2} \mathbf{Z}_1 \mathbf{W}_1 +$$

$$759 \mathbf{W}'_2 \mathbf{Z}'_2 \mathbf{R}_2^{-1} \sigma_e^{-2} \mathbf{Z}_2 \mathbf{W}_2 + \mathbf{B}_J^{-1} \sigma_{\alpha_J}^{-2}) \widehat{\boldsymbol{\alpha}} = \mathbf{W}'_1 \mathbf{Z}'_1 \mathbf{R}_1^{-1} \sigma_e^{-2} \mathbf{y}_1 + \mathbf{W}'_2 \mathbf{Z}'_2 \mathbf{R}_2^{-1} \sigma_e^{-2} \mathbf{y}_2. \quad (\text{A1.4}).$$

760 Inserting (A1.3) into (A1.4) gives, after some algebra:

$$761 \mathbf{W}'_2 \mathbf{Z}'_2 \mathbf{R}_2^{-1} \sigma_e^{-2} \mathbf{X}_2 \widehat{\boldsymbol{\beta}}_2 + (\mathbf{W}'_1 \mathbf{Z}'_1 \mathbf{M}_1 \sigma_e^{-2} \mathbf{Z}_1 \mathbf{W}_1 + \mathbf{W}'_2 \mathbf{Z}'_2 \mathbf{R}_2^{-1} \sigma_e^{-2} \mathbf{Z}_2 \mathbf{W}_2 + \mathbf{B}_J^{-1} \sigma_{\alpha_J}^{-2}) \widehat{\boldsymbol{\alpha}}$$

$$762 = \mathbf{W}'_1 \mathbf{Z}'_1 \mathbf{M}_1 \sigma_e^{-2} \mathbf{y}_1 + \mathbf{W}'_2 \mathbf{Z}'_2 \mathbf{R}_2^{-1} \sigma_e^{-2} \mathbf{y}_2$$

## Multi-population genomic prediction

763 with  $\mathbf{M}_1 = \left( \mathbf{R}_1^{-1} - \mathbf{R}_1^{-1} \mathbf{X}_1 (\mathbf{X}_1' \mathbf{R}_1^{-1} \mathbf{X}_1)^{-1} \mathbf{X}_1' \mathbf{R}_1^{-1} \right)$ .

764 Now the system of equations (A1.2) can be re-written with the first set of equations

765  $(\widehat{\boldsymbol{\beta}}_1)$  absorbed as:

$$766 \begin{bmatrix} \mathbf{X}_2' \mathbf{R}_2^{-1} \sigma_e^{-2} \mathbf{X}_2 & \mathbf{X}_2' \mathbf{R}_2^{-1} \sigma_e^{-2} \mathbf{Z}_2 \mathbf{W}_2 \\ \mathbf{W}_2' \mathbf{Z}_2' \mathbf{R}_2^{-1} \sigma_e^{-2} \mathbf{X}_2 & \mathbf{W}_1' \mathbf{Z}_1' \mathbf{M}_1 \sigma_e^{-2} \mathbf{Z}_1 \mathbf{W}_1 + \mathbf{W}_2' \mathbf{Z}_2' \mathbf{R}_2^{-1} \sigma_e^{-2} \mathbf{Z}_2 \mathbf{W}_2 + \mathbf{B}_J^{-1} \sigma_{\alpha_j}^{-2} \end{bmatrix} \begin{bmatrix} \widehat{\boldsymbol{\beta}}_2 \\ \widehat{\boldsymbol{\alpha}} \end{bmatrix} =$$

$$767 \begin{bmatrix} \mathbf{X}_2' \mathbf{R}_2^{-1} \sigma_e^{-2} \mathbf{y}_2 \\ \mathbf{W}_1' \mathbf{Z}_1' \mathbf{M}_1 \sigma_e^{-2} \mathbf{y}_1 + \mathbf{W}_2' \mathbf{Z}_2' \mathbf{R}_2^{-1} \sigma_e^{-2} \mathbf{y}_2 \end{bmatrix}. \quad (\text{A1.4})$$

768 Similarly, the absorption of the first set of equations  $(\widehat{\boldsymbol{\beta}}_1^*)$  in separate analysis of dataset

769 1 (A1.1) leads to:

$$770 (\mathbf{W}_1' \mathbf{Z}_1' \mathbf{M}_1 \sigma_e^{-2} \mathbf{Z}_1 \mathbf{W}_1 + \mathbf{B}_1^{-1} \sigma_{\alpha_1}^{-2}) \widehat{\boldsymbol{\alpha}}_1^* = \mathbf{W}_1' \mathbf{Z}_1' \mathbf{M}_1 \sigma_e^{-2} \mathbf{y}_1, \quad (\text{A1.5})$$

771 where

$$772 \mathbf{W}_1' \mathbf{Z}_1' \mathbf{M}_1 \sigma_e^{-2} \mathbf{Z}_1 \mathbf{W}_1 + \mathbf{B}_1^{-1} \sigma_{\alpha_1}^{-2} = \left( \text{PEC}(\widehat{\boldsymbol{\alpha}}_1^*) \right)^{-1} \quad (\text{A1.6})$$

773 is the inverse matrix of prediction error covariances of  $\widehat{\boldsymbol{\alpha}}_1^*$ .

774 Combining (A1.4) and (A1.5) with the use of (A1.6) enables the exact integration of

775 estimates from the separate analysis of dataset 1 into the separate analysis of dataset 2 with the

776 following system of equations:

$$777 \begin{bmatrix} \mathbf{X}_2' \mathbf{R}_2^{-1} \sigma_e^{-2} \mathbf{X}_2 & \mathbf{X}_2' \mathbf{R}_2^{-1} \sigma_e^{-2} \mathbf{Z}_2 \mathbf{W}_2 \\ \mathbf{W}_2' \mathbf{Z}_2' \mathbf{R}_2^{-1} \sigma_e^{-2} \mathbf{X}_2 & \left( \text{PEC}(\widehat{\boldsymbol{\alpha}}_1^*) \right)^{-1} + \mathbf{W}_2' \mathbf{Z}_2' \mathbf{R}_2^{-1} \sigma_e^{-2} \mathbf{Z}_2 \mathbf{W}_2 - \mathbf{B}_1^{-1} \sigma_{\alpha_1}^{-2} + \mathbf{B}_J^{-1} \sigma_{\alpha_j}^{-2} \end{bmatrix} \begin{bmatrix} \widehat{\boldsymbol{\beta}}_2 \\ \widehat{\boldsymbol{\alpha}} \end{bmatrix} =$$

$$778 \begin{bmatrix} \mathbf{X}_2' \mathbf{R}_2^{-1} \sigma_e^{-2} \mathbf{y}_2 \\ \left( \text{PEC}(\widehat{\boldsymbol{\alpha}}_1^*) \right)^{-1} \widehat{\boldsymbol{\alpha}}_1^* + \mathbf{W}_2' \mathbf{Z}_2' \mathbf{R}_2^{-1} \sigma_e^{-2} \mathbf{y}_2 \end{bmatrix}. \quad (\text{A1.7})$$

779

## Multi-population genomic prediction

### 780 **Appendix A2: Approximate integration**

781 Here we detail the derivation of different approximate integrations by means of  
 782 simplified assumptions and use of summary statistics. We start with the expression for  
 783 prediction error covariance matrix of allele substitution effects from dataset 1:

$$784 \quad PEC(\widehat{\boldsymbol{\alpha}}_1^*) = (\mathbf{W}'_1 \mathbf{Z}'_1 \mathbf{M}_1 \sigma_e^{-2} \mathbf{Z}_1 \mathbf{W}_1 + \mathbf{B}_1^{-1} \sigma_{\alpha_1}^{-2})^{-1}. \quad (\text{A2.1})$$

785 If we assume that: (1) every individual has a single phenotype record, i.e.,  $\mathbf{Z}_1 = \mathbf{I}$ , (2) residual  
 786 variance is homogeneous, i.e.  $\mathbf{R}_1 = \mathbf{I}$ , and (3) only overall mean is fitted as a fixed effect, i.e.,  
 787  $\mathbf{X}_1 = \mathbf{1}$ ; then we can simplify (A2.1) as:

$$788 \quad PEC(\widehat{\boldsymbol{\alpha}}_1^*) = (\mathbf{W}'_1 \mathbf{Z}'_1 \mathbf{M}_1 \sigma_e^{-2} \mathbf{Z}_1 \mathbf{W}_1 + \mathbf{B}_1^{-1} \sigma_{\alpha_1}^{-2})^{-1},$$

$$789 \quad = (\mathbf{W}'_1 \mathbf{Z}'_1 (\mathbf{R}_1^{-1} - \mathbf{R}_1^{-1} \mathbf{X}_1 (\mathbf{X}'_1 \mathbf{R}_1^{-1} \mathbf{X}_1)^{-1} \mathbf{X}'_1 \mathbf{R}_1^{-1}) \mathbf{Z}_1 \mathbf{W}_1 \sigma_e^{-2} + \mathbf{B}_1^{-1} \sigma_{\alpha_1}^{-2})^{-1},$$

$$790 \quad \approx (\mathbf{W}'_1 (\mathbf{I} - \mathbf{X}_1 (\mathbf{X}'_1 \mathbf{X}_1)^{-1} \mathbf{X}'_1) \mathbf{W}_1 \sigma_e^{-2} + \mathbf{B}_1^{-1} \sigma_{\alpha_1}^{-2})^{-1},$$

$$791 \quad \approx (\mathbf{W}'_1 \mathbf{W}_1 \sigma_e^{-2} + \mathbf{B}_1^{-1} \sigma_{\alpha_1}^{-2})^{-1}, \quad (\text{A2.2})$$

792 because  $(\mathbf{I} - \mathbf{X}_1 (\mathbf{X}'_1 \mathbf{X}_1)^{-1} \mathbf{X}'_1) = \mathbf{I} - \mathbf{1}(\mathbf{1}'\mathbf{1})^{-1}\mathbf{1}' = \mathbf{I} - \frac{\mathbf{1}\mathbf{1}'}{n_{ind,1}}$  will tend to the identity matrix  
 793  $\mathbf{I}$  with increasing  $n_{ind,1}$ . The matrix  $(\mathbf{I} - \frac{\mathbf{1}\mathbf{1}'}{n_{ind,1}})$ , also known as the centering matrix, is a  
 794 symmetric and idempotent matrix with off-diagonal elements equal to  $-\frac{1}{n_{ind,1}}$  and with  
 795 diagonal elements equal to  $1 - \frac{1}{n_{ind,1}}$ .

796 When genotypes from the dataset 1 are not available, but variance components  $\sigma_{\alpha_1}^2$  and  
 797  $\sigma_e^2$  are, we “only” need to approximate the unknown matrix of genotype sum of squares  $\mathbf{W}'_1 \mathbf{W}_1$   
 798 in (A2.2). This product can be approximated from linkage-disequilibrium and allele frequency

## Multi-population genomic prediction

799 information of the dataset 1, as shown in the following (similarly to Yang et al. (2012),  
 800 Vilhjálmsson et al. (2015), and Maier et al. (2018)). Assume that linkage-disequilibrium  
 801 between two markers is represented by the correlation of their unphased genotypes (Rogers and  
 802 Huff, 2009). Then, a matrix of all pairwise correlations between markers is:

$$803 \quad \mathbf{C} = \left( \text{diag}(\mathbf{T}'_1 \mathbf{T}_1) \right)^{-\frac{1}{2}} \mathbf{T}'_1 \mathbf{T}_1 \left( \text{diag}(\mathbf{T}'_1 \mathbf{T}_1) \right)^{-\frac{1}{2}}, \quad (\text{A2.3})$$

804 where the matrix  $\mathbf{T}_1$  contains centered genotypes of dataset 1 ( $\mathbf{T}_1 = \left( \mathbf{I} - \frac{\mathbf{1}\mathbf{1}'}{n_{ind,1}} \right) \mathbf{W}_1 =$   
 805  $\mathbf{W}_1 - \frac{1}{n_{ind,1}} \mathbf{1}\mathbf{1}'\mathbf{W}_1$ ). The matrix product  $\mathbf{T}'_1 \mathbf{T}_1$  can be computed as:

$$806 \quad \mathbf{T}'_1 \mathbf{T}_1 = \left( \mathbf{W}_1 - \frac{1}{n_{ind,1}} \mathbf{1}\mathbf{1}'\mathbf{W}_1 \right)' \left( \mathbf{W}_1 - \frac{1}{n_{ind,1}} \mathbf{1}\mathbf{1}'\mathbf{W}_1 \right) = \mathbf{W}'_1 \mathbf{W}_1 - \frac{1}{n_{ind,1}} \mathbf{W}'_1 \mathbf{1}\mathbf{1}'\mathbf{W}_1 -$$

$$807 \quad \frac{1}{n_{ind,1}} \mathbf{W}'_1 \mathbf{1}\mathbf{1}'\mathbf{W}_1 + \frac{1}{n_{ind,1}} \frac{1}{n_{ind,1}} \mathbf{W}'_1 \mathbf{1}\mathbf{1}'\mathbf{1}\mathbf{1}'\mathbf{W}_1 = \mathbf{W}'_1 \mathbf{W}_1 - 4n_{ind,1} \mathbf{p}\mathbf{p}'. \quad (\text{A2.4})$$

808 where  $\mathbf{p} = \frac{1}{2n_{ind,1}} \mathbf{W}'_1 \mathbf{1}$  are allele frequencies in dataset 1 (Strandén and Christensen, 2011).

809 Assuming Hardy-Weinberg equilibrium, the  $i$ -th diagonal element of the matrix product  $\mathbf{T}'_1 \mathbf{T}_1$ ,  
 810 is equivalent to expected genotype sum of squares at the  $i$ -th marker,  $n_{ind,1} 2p_{i,1}(1 - p_{i,1})$  with  
 811  $p_{i,1}$  being the allele frequency of the  $i$ -th marker in dataset 1.

812 Combining (A2.3) and (A2.4) we can approximate the unknown matrix of genotype  
 813 sum of squares  $\mathbf{W}'_1 \mathbf{W}_1$  as:

$$814 \quad \mathbf{W}'_1 \mathbf{W}_1 \approx 4n_{ind,1} \mathbf{p}\mathbf{p}' + \mathbf{V}^{\frac{1}{2}} \mathbf{C} \mathbf{V}^{\frac{1}{2}}, \quad (\text{A2.5})$$

815 where  $\mathbf{V}$  is diagonal matrix of expected genotype sum of squares with the  $i$ -th diagonal element  
 816 equal to  $n_{ind,1} 2p_{i,1}(1 - p_{i,1})$ .

817

## Multi-population genomic prediction

### 818 **Appendix A3: Estimation of the effective number of records per marker**

819 Here we detail the algorithm for computing the effective number of records per marker  
 820 by use of available population parameters (i.e. linkage-disequilibrium, and allele frequency  
 821 information) and prediction error variances of  $\widehat{\alpha}_1^*$  ( $PEV(\widehat{\alpha}_1^*)$ ) of the dataset 1. We start with the  
 822 expression for the prediction error covariance matrix of allele substitution effects from dataset  
 823 1:

$$824 \quad PEC(\widehat{\alpha}_1^*) = (\mathbf{W}'_1 \mathbf{Z}'_1 \mathbf{M}_1 \sigma_e^{-2} \mathbf{Z}_1 \mathbf{W}_1 + \mathbf{B}_1^{-1} \sigma_{\alpha_1}^{-2})^{-1}.$$

825 If the number of individuals and the number of records per individual are unknown, we can  
 826 assume that a  $n_{mar} \times n_{mar}$  diagonal matrix  $\Lambda_1$  exists such that:

$$827 \quad PEC(\widehat{\alpha}_1^*) \approx \left( \Lambda_1 \left( 4\mathbf{p}\mathbf{p}' + \Psi^{\frac{1}{2}} \mathbf{C} \Psi^{\frac{1}{2}} \right) \Lambda_1 \sigma_e^{-2} + \mathbf{B}_1^{-1} \sigma_{\alpha_1}^{-2} \right)^{-1}$$

828 where  $\Psi$  is a  $n_{mar} \times n_{mar}$  diagonal matrix with the  $j$ -th diagonal element equal to  
 829  $2p_{j,1}(1 - p_{j,1})$ , and the squared  $j$ -th diagonal element of  $\Lambda_1$  represents the effective number of  
 830 records for the  $j$ -th marker. The term  $(4\mathbf{p}\mathbf{p}' + \Psi^{\frac{1}{2}} \mathbf{C} \Psi^{\frac{1}{2}})$  is similar to the approximation of the  
 831 unknown matrix of genotype sum of squares  $\mathbf{W}'_1 \mathbf{W}_1$  (i.e.,  $\mathbf{W}'_1 \mathbf{W}_1 \approx 4n_{ind,1} \mathbf{p}\mathbf{p}' + \mathbf{V}^{\frac{1}{2}} \mathbf{C} \mathbf{V}^{\frac{1}{2}}$ ) in  
 832 the Appendix A.2. However, it does not involve the number of individuals  $n_{ind,1}$  because it is  
 833 confounded with the effective number of records.

834 The diagonal matrix  $\Lambda_1$  can be estimated by solving the nonlinear system of equations

$$835 \quad \text{diag} \left( \left( \Lambda_1 \left( 4\mathbf{p}\mathbf{p}' + \Psi^{\frac{1}{2}} \mathbf{C} \Psi^{\frac{1}{2}} \right) \Lambda_1 \sigma_e^{-2} + \mathbf{B}_1^{-1} \sigma_{\alpha_1}^{-2} \right)^{-1} \right) = PEV(\widehat{\alpha}_1^*)$$

836 iteration algorithm (Burden and Faires, 2010) as follows:

$$837 \quad 1) \quad \mathbf{Q}_1^0 = \left( \mathbf{P}^0{}^{-1} - \mathbf{B}_1^{-1} \sigma_{\alpha_1}^{-2} \right) * \left( \text{diag} \left( 4\mathbf{p}\mathbf{p}' + \Psi^{\frac{1}{2}} \mathbf{C} \Psi^{\frac{1}{2}} \right) \sigma_e^{-2} \right)^{-1}$$



## Multi-population genomic prediction

838 where  $\mathbf{P}^0$  is a diagonal matrix with the  $i$ -th diagonal element equal to the PEV of the  $i$ -  
 839 th marker and  $diag\left(4\mathbf{pp}' + \Psi_{\frac{1}{2}}\mathbf{C}\Psi_{\frac{1}{2}}\right)$  contains the diagonal elements of  $\left(4\mathbf{pp}' + \Psi_{\frac{1}{2}}\mathbf{C}\Psi_{\frac{1}{2}}\right)$ ;

841 2)  $\Lambda_1^0 = \sqrt{\mathbf{Q}_1^0}$

842 3)  $k = 1$

843 4)  $\mathbf{P}^k = diag\left(\left(\Lambda_1^{k-1}\left(4\mathbf{pp}' + \Psi_{\frac{1}{2}}\mathbf{C}\Psi_{\frac{1}{2}}\right)\Lambda_1^{k-1}\sigma_e^{-2} + \mathbf{B}_1^{-1}\sigma_{\alpha_1}^{-2}\right)^{-1}\right)$

844 5)  $\mathbf{H} = \left(\mathbf{P}^{k-1} - \mathbf{B}_1^{-1}\sigma_{\alpha_1}^{-2}\right) * \left(diag\left(4\mathbf{pp}' + \Psi_{\frac{1}{2}}\mathbf{C}\Psi_{\frac{1}{2}}\right)\sigma_e^{-2}\right)^{-1}$

845 6)  $\mathbf{S}^k = \mathbf{Q}_1^0 - \mathbf{H}$

846 7) If trace of  $\mathbf{S}^k$  is not sufficiently small:

847 a.  $\mathbf{Q}_1^k = \mathbf{Q}_1^{k-1} + \mathbf{H}$

848 b. If any diagonal element in  $\mathbf{Q}_1^k$  is negative, set it to 0

849 c.  $\Lambda_1^k = \sqrt{\mathbf{Q}_1^k}$

850 d.  $k = k + 1$

851 e. Repeat from 4

852 8)  $\Lambda_1^k = \sqrt{\mathbf{Q}_1^k}$

853 It is worth noting that the proposed algorithm is similar to algorithms to estimate effective  
 854 number of records per individual, where “effective” means that they are free of contributions  
 855 from relatives (Miształ and Wiggans, 1988; Vandenplas and Gengler, 2012). The  $j$ -th diagonal  
 856 element of  $\mathbf{Q}_1^k$  can therefore equivalently be considered as the effective number of records for  
 857 the  $j$ -th marker.

858

## Multi-population genomic prediction

### 859 **Appendix A4: Conversion of allele substitution effects**

860 Here we detail a post-analysis to obtain allele substitution effects estimated using one  
861 type of genotype coding ( $\widehat{\alpha}_1^{**}$ ) by converting estimated genetic values computed for a reference  
862 genotype panel with allele substitution effects for another genotype coding ( $\widehat{\alpha}_1^*$ ). We assume  
863 that allele substitution effects ( $\widehat{\alpha}_1^*$ ) are available with the associated prediction error  
864 (co)variance matrix ( $PEC(\widehat{\alpha}_1^*)$ ), as well as the (co)variance matrix of  $\alpha_1^*$  ( $Var(\alpha_1^*)$ ), and  
865 genotypes of a reference panel using a particular type of genotype coding ( $\Gamma^*$ ). Estimates of  
866 genetic values for the reference individuals are obtained as  $\widehat{\mathbf{g}}_1^* = \Gamma^* \widehat{\alpha}_1^*$ .

867 Assuming that estimated genetic values are not influenced by scaling of centered  
868 genotype coding (Strandén and Christensen, 2011; Bouwman et al., 2017), and that the  
869 (co)variances of genetic values are the same irrespective of the genotype coding, we can write  
870 that  $\widehat{\mathbf{g}}_1^{**} = \Gamma^{**} \widehat{\alpha}_1^{**} = \widehat{\mathbf{g}}_1^*$  with  $\Gamma^{**}$  being a matrix with reference genotypes using another type  
871 of genotype coding than  $\Gamma^*$  and  $\widehat{\mathbf{g}}_1^{**}$  being a vector of estimated genetic values using this type  
872 of genotype coding. Therefore,  $\widehat{\alpha}_1^{**}$  can be computed by back-solving as follows (Strandén and  
873 Garrick, 2009; Wang et al., 2012; Bouwman et al., 2017):

$$874 \quad \widehat{\alpha}_1^{**} = \mathbf{B}_1^{**} \Gamma^{**'} (\Gamma^{**} \mathbf{B}_1^{**} \Gamma^{**'})^{-1} \widehat{\mathbf{g}}_1^* = \mathbf{T} \widehat{\mathbf{g}}_1^*$$

875 where  $\mathbf{B}_1^{**}$  is a diagonal matrix (e.g., an identity matrix  $\mathbf{I}$ ) with optional different weights to  
876 differentially shrink different loci.

877 Based on the properties of mixed models (Henderson, 1984), the prediction error  
878 covariance matrix of  $\widehat{\alpha}_1^{**}$ ,  $PEC(\widehat{\alpha}_1^{**})$ , can be obtained as follows:

### Multi-population genomic prediction

$$\begin{aligned} 879 \quad PEC(\widehat{\boldsymbol{\alpha}}_1^{**}) &= Var(\boldsymbol{\alpha}_1^{**}) - Var(\widehat{\boldsymbol{\alpha}}_1^{**}) = Var(\boldsymbol{\alpha}_1^{**}) - Var(\mathbf{T}\widehat{\mathbf{g}}_1^*) = Var(\boldsymbol{\alpha}_1^{**}) - \mathbf{T}Var(\widehat{\mathbf{g}}_1^*)\mathbf{T}' \\ 880 \quad &= Var(\boldsymbol{\alpha}_1^{**}) - \mathbf{T} \left( Var(\mathbf{g}_1^*) - PEC(\widehat{\mathbf{g}}_1^*) \right) \mathbf{T}' \\ 881 \quad &= Var(\boldsymbol{\alpha}_1^{**}) - \mathbf{T} \left( \boldsymbol{\Gamma}^* Var(\boldsymbol{\alpha}_1^*) \boldsymbol{\Gamma}^{*'} - \boldsymbol{\Gamma}^* PEC(\widehat{\boldsymbol{\alpha}}_1^*) \boldsymbol{\Gamma}^{*'} \right) \mathbf{T}' \\ 882 \quad &= Var(\boldsymbol{\alpha}_1^{**}) - \mathbf{T} \boldsymbol{\Gamma}^* \left( Var(\boldsymbol{\alpha}_1^*) - PEC(\widehat{\boldsymbol{\alpha}}_1^*) \right) \boldsymbol{\Gamma}^{*'} \mathbf{T}' \end{aligned}$$

883
